1 **DNA methylation across the genome in aged human skeletal muscle tissue and stem cells: The**  
2 **role of HOX genes and physical activity**

3  
4 Turner DC<sup>#1,2,3</sup>, Gorski PP<sup>#1,3</sup>, Maasar MF<sup>4</sup>, Seaborne RA<sup>2,3,6</sup>, Baumert P<sup>4,5</sup>, Brown AD<sup>2</sup>, Kitchen MO<sup>3</sup>, Erskine  
5 RM<sup>4,7</sup>, Dos-Remedios I<sup>8</sup>, Voisin S<sup>9</sup>, Eynon N<sup>9</sup>, Sultanov RI<sup>10</sup>, Borisov OV<sup>10,11</sup>, Larin AK<sup>10</sup>, Semenova EA<sup>10</sup>,  
6 Popov DV<sup>12</sup>, Generozov EV<sup>10</sup>, Stewart CE<sup>2</sup>, Drust B<sup>14</sup>, Owens DJ<sup>2,4</sup>, Ahmetov IJ<sup>§4,13,15</sup>, Sharples AP<sup>\*1,2,3</sup>

7 <sup>1</sup> Department for Physical Performance, Norwegian School of Sport Sciences (NiH), Oslo, Norway.

8 <sup>2</sup> Stem Cells, Ageing and Molecular Physiology Unit, Exercise Metabolism and Adaptation Research Group, Research  
9 Institute for Sport and Exercise Sciences, Liverpool John Moores University, Liverpool, United Kingdom.

10 <sup>3</sup> Institute for Science and Technology in Medicine (ISTM), School of Pharmacy & Bioengineering, Keele University,  
11 Staffordshire, United Kingdom.

12 <sup>4</sup> Exercise Metabolism and Adaptation Research Group, Research Institute for Sport and Exercise Sciences, Liverpool  
13 John Moores University, Liverpool, United Kingdom.

14 <sup>5</sup> Exercise Biology Group, Faculty of Sport and Health Sciences, Technical University of Munich, Munich, Germany.

15 <sup>6</sup> Centre for Genomics and Child Health, Blizard Institute, Barts and the London School of Medicine and Dentistry, Queen  
16 Mary University of London, London, United Kingdom.

17 <sup>7</sup> Institute of Sport, Exercise and Health, University College London, London, United Kingdom

18 <sup>8</sup> Orthopedics Department, University Hospitals of the North Midlands, Staffordshire, UK.

19 <sup>9</sup> Institute for Health and Sport (iHeS), Victoria University, Footscray, Victoria, Australia.

20 <sup>10</sup> Department of Molecular Biology and Genetics, Federal Research and Clinical Center of Physical-Chemical Medicine  
21 of Federal Medical Biological Agency, Moscow, Russia.

22 <sup>11</sup> Institute for Genomic Statistics and Bioinformatics, University Hospital Bonn, Bonn, Germany

23 <sup>12</sup> Laboratory of Exercise Physiology, Institute of Biomedical Problems of the Russian Academy of Sciences, Moscow,  
24 Russia.

25 <sup>13</sup> Laboratory of Molecular Genetics, Kazan State Medical University, Kazan, Russia.

26 <sup>14</sup> School of Sport, Exercise and Rehabilitation Sciences, College of Life and Environmental Sciences, University of  
27 Birmingham.

28 <sup>15</sup> Department of Physical Education, Plekhanov Russian University of Economics, Moscow, Russia

29

30

31 #These authors contributed equally to the work.

32

33 \*Corresponding author for Skeletal muscle tissue, stem cells and DNA / HOX methylation

34 [a.p.sharples@googlemail.com](mailto:a.p.sharples@googlemail.com)

35 § Corresponding author for physical activity and HOX methylation

36 [I.Ahmetov@ljmu.ac.uk](mailto:I.Ahmetov@ljmu.ac.uk)

37

38 **Abstract**

39

40 Skeletal muscle tissue demonstrates global hypermethylation with aging. However, methylome changes  
41 across the time-course of differentiation in aged human muscle stem cells and larger coverage arrays in aged  
42 muscle tissue have not been undertaken. Using 850K DNA methylation arrays we compared the methylomes  
43 of young ( $27 \pm 4.4$  years) and aged ( $83 \pm 4$  years) human skeletal muscle and that of young/aged muscle stem  
44 cells over several time points of differentiation (0, 72 hours, 7, 10 days). Aged muscle tissue was  
45 hypermethylated compared with young tissue, enriched for; 'pathways-in-cancer' (including; focal adhesion,  
46 MAPK signaling, PI3K-Akt-mTOR signaling, p53 signaling, Jak-STAT signaling, TGF-beta and notch signaling),  
47 'rap1-signaling', 'axon-guidance' and 'hippo-signalling'. Aged muscle stem cells also demonstrated a  
48 hypermethylated profile in pathways; 'axon-guidance', 'adherens-junction' and 'calcium-signaling',  
49 particularly at later timepoints of myotube formation, corresponding with reduced morphological  
50 differentiation and reductions in MyoD/Myogenin gene expression compared with young cells. While young  
51 cells showed little alteration in DNA methylation during differentiation, aged cells demonstrated extensive  
52 and significantly altered DNA methylation, particularly at 7 days of differentiation and most notably in the  
53 'focal adhesion' and 'PI3K-AKT signalling' pathways. While the methylomes were vastly different between  
54 muscle tissue and isolated muscle stem cells, we identified a small number of CpG sites showing a  
55 hypermethylated state with age, in both muscle and tissue and stem cells (on genes *KIF15*, *DYRK2*, *FHL2*,  
56 *MRPS33*, *ABCA17P*). Most notably, differential methylation analysis of chromosomal regions identified three  
57 locations containing enrichment of 6-8 CpGs in the HOX family of genes altered with age. With *HOXD10*,  
58 *HOXD9*, *HOXD8*, *HOXA3*, *HOXC9*, *HOXB1*, *HOXB3*, *HOXC-AS2* and *HOXC10* all hypermethylated in aged tissue.  
59 In aged cells the same HOX genes (and additionally *HOXC-AS3*) displayed the most variable methylation at 7  
60 days of differentiation versus young cells, with *HOXD8*, *HOXC9*, *HOXB1* and *HOXC-AS3* hypermethylated and  
61 *HOXC10* and *HOXC-AS2* hypomethylated. We also determined that there was an inverse relationship  
62 between DNA methylation and gene expression for *HOXB1*, *HOXA3* and *HOXC-AS3*. Finally, increased physical  
63 activity in young adults was associated with oppositely regulating *HOXB1* and *HOXA3* methylation compared  
64 with age. Overall, we demonstrate that a considerable number of HOX genes are differentially epigenetically  
65 regulated in aged human skeletal muscle and muscle stem cells and increased physical activity may help  
66 prevent age-related epigenetic changes in these HOX genes.

67

68

69

70

71

72 **Keywords:** Epigenetics, Aging, DNA methylation, Exercise

73

## 74 **Introduction**

75

76 Maintaining skeletal muscle mass and function into older age is fundamental for human health-span and  
77 quality of life <sup>1</sup>. Five to ten percent of older humans have sarcopenia <sup>2,3</sup>, which is characterized by reductions  
78 in muscle mass and strength <sup>4</sup>. This loss of muscle mass and strength leads to frailty, increased incidence of  
79 falls, hospitalization and morbidity <sup>4, 5, 6, 7, 8, 9, 10, 11</sup>. Annual costs of fragility are estimated to be 39/32 billion  
80 (Euros/USD) for European and USA fragility fractures respectively, with the cost of sarcopenia estimated to  
81 be £2 billion in the UK <sup>12</sup>. With an ageing population, these costs are likely to increase with time.

82

83 A primary hallmark of ageing is the alteration of the epigenetic landscape. Epigenetics encompasses the  
84 interaction between lifestyle/environmental factors and modifications to DNA and histones, without changes  
85 to the inherited DNA sequence <sup>13, 14</sup>. DNA methylation is the most studied epigenetic modification and  
86 involves the addition of a covalent methyl group to the 5' position of the pyrimidine ring of a cytosine (5mC).  
87 Increased methylation (hypermethylation) to cytosine-guanine (C-G) pairings (CpG sites), especially in CpG-  
88 rich regions such as gene promoters, typically leads to reduced capacity for the transcriptional apparatus to  
89 bind to these regions, suppressing gene expression <sup>14</sup>. Methylated CpG islands in promoters also leads to a  
90 tight compaction of adjacent chromatin via the recruitment of chromatin modifying protein/protein-  
91 complexes, further silencing gene expression. In contrast, reduced methylation (hypomethylation) provides  
92 a more favorable DNA landscape for the transcriptional apparatus to bind to these regions, as well as more  
93 'relaxed' chromatin, enabling gene expression to occur.

94

95 DNA methylation in aged skeletal muscle occurs at tissue-specific genes <sup>15</sup>. However, aged muscle also has  
96 the smallest overlap with other aged tissue types, suggesting skeletal muscle is unique in comparison with  
97 other tissues in its epigenetic aging processes <sup>15</sup>. Indeed, it has recently been demonstrated that the  
98 methylation status of approximately 200 CpG sites can accurately predict chronological age in skeletal muscle  
99 tissue <sup>16</sup>. But that this muscle 'clock' only shares 16 of these CpG's with the original 353 CpG pan-tissue  
100 Horvath clock <sup>16, 17</sup>. Further, using DNA methylation arrays with coverage of ~450,000 CpG sites <sup>18</sup>, Zykovich  
101 *et al.* demonstrated that compared with young human skeletal muscle, aged skeletal muscle is  
102 hypermethylated across the genome. Moreover, our group has demonstrated that mouse skeletal muscle  
103 stem cells exposed to a high dose of inflammatory stress in early proliferative life retained hypermethylation  
104 of *MyoD* (a muscle-specific regulatory factor) 30 population doublings later <sup>19</sup>. This suggests that inflamed  
105 proliferative aging in muscle stem cells leads to a retained accumulation of DNA methylation. Finally, lifelong  
106 physical activity <sup>20</sup>, endurance and resistance exercise <sup>20</sup> have been associated with predominantly  
107 hypomethylation of the genome in young skeletal muscle <sup>21, 22</sup>. This contrasts with the hypermethylation  
108 observed with aging, suggesting that exercise may reverse some age-related changes in DNA methylation.

109

110 Skeletal muscle fibers are post-mitotic as they contain terminally differentiated/fused nuclei (myonuclei);  
111 thus, repair and regeneration of skeletal muscle tissue is mediated by a separate population of resident stem  
112 cells (satellite cells) that can divide. Once activated, satellite cells proliferate and migrate to the site of injury  
113 to differentiate and fuse with the existing fibers to enable repair. Target gene analysis showed altered DNA  
114 methylation during differentiation of muscle cells into myotubes *in-vitro*<sup>23</sup>. This included altered methylation  
115 of MyoD<sup>24</sup>, Myogenin<sup>25</sup> and Six1<sup>26</sup>. While muscle stem cells derived from aged individuals display similar  
116 proliferative capacity and time to senescence as young adult cells<sup>27,28</sup>, they do have impaired differentiation  
117 and fusion into myotubes<sup>29, 30, 31, 32, 33, 34, 35, 36, 37, 38, 39, 40, 41, 42, 43, 44, 45</sup>. However, a small number of studies did  
118 not find an effect of age on the differentiation capacity of isolated cells<sup>27, 46, 47</sup>. A single study assessed DNA  
119 methylation across the genome (450K CpG sites) in aged versus young adult muscle stem cells<sup>27</sup> and showed  
120 genome-wide hypermethylation in aged cells as well as aged tissue<sup>27</sup>.

121

122 To date, there has been no report of genome-wide DNA methylation dynamics during the entire time-course  
123 of muscle cell differentiation, or how age modulates these dynamics. Furthermore, the latest, larger coverage  
124 methylation arrays have not yet been implemented in aged muscle tissue. Therefore, the objectives of the  
125 current study were: 1) To describe the dynamics of the human DNA methylome in aged and young adult  
126 skeletal muscle tissue and primary muscle-derived stem cells over an extensive time-course of  
127 differentiation; 0 h (30 minutes post transfer to differentiation media), 72 h (hours), 7 d (days) and 10 d using  
128 high coverage 850K CpG arrays. 2) To identify if methylation patterns are similar or different in muscle stem  
129 cells compared to skeletal muscle tissue. 3) To test whether increasing physical activity levels is associated  
130 with altering DNA methylation in the same genes in aged muscle.

131

## 132 **Methods**

133

### 134 *Skeletal muscle biopsies and primary cell isolations*

135 For young adults (n = 9, male, 27 ± 4.4 years-old), skeletal muscle tissue (~150 mg) was obtained from the  
136 vastus lateralis via a conchotome biopsy. Consent and ethical approval were granted for the collection of  
137 muscle tissue under NREC, UK approval (16/WM/010) or LJMU, UK local ethics committee approvals  
138 [H19/SPS/028 & H15/SPS/031]. Six (out of 9) of the young adult's tissue (male, 28 ± 5.3 years) baseline (at  
139 rest) array data was derived from Seaborne *et al.* (2018). This is because we used this baseline tissue to derive  
140 cells (detailed below) for DNA methylation analysis of stem cell experiments in the present study. For older  
141 adults (n = 5, 2 men/3 women, 83 ± 4 years), tissue biopsies were obtained during elective orthopedic  
142 surgeries from University Hospitals of the North Midlands, from the vastus lateralis (knee surgery, n = 2) or  
143 gluteus medius muscles (hip surgery, n = 3), under consent and ethical approval 18/WM/0187. DNA and RNA  
144 were isolated from these young and aged tissue samples. DNA samples from all 9 young and 5 aged adults  
145 were analysed for DNA methylation arrays (detailed below), and a subset were analysed for gene expression

146 (young n = 4, aged n = 5). Primary skeletal muscle cells were derived from a subset of young adult and aged  
147 tissue samples, and isolated as per our previous work<sup>21, 22, 48, 49, 50</sup>. Briefly, approximately 100 mg biopsy tissue  
148 was immediately (~10-30 mins) transferred to a sterile class II biological safety cabinet in pre-cooled (4°C)  
149 transfer media (Hams F-10, 2% hi-FBS, 100 U/ml penicillin, 100 µg/ml streptomycin and 2.5 µg/ml  
150 amphotericin-B). Any visible connective and adipose tissue were removed using sterile scalpels and muscle  
151 tissue was thoroughly washed 2 × in sterile PBS (containing 100 U/ml penicillin, 100 µg/ml streptomycin, 2.5  
152 µg/ml amphotericin-B). PBS was removed and the muscle tissue was minced in the presence of 0.05%  
153 Trypsin/0.02% EDTA and all contents (tissue and trypsin) were transferred to a magnetic stirring platform at  
154 37°C for 10 minutes. The addition of 0.05% Trypsin/0.02% EDTA and titration was repeated on any remaining  
155 tissue. The supernatant was collected from both procedures and horse serum (HS) was added at 10% of the  
156 total supernatant volume to neutralize the trypsin. The supernatant was centrifuged at 340 g for 5 minutes  
157 where the supernatant and cell pellet were both plated in separate pre-gelatinised (0.2% gelatin) T25 flasks  
158 containing 7.5 ml fresh pre-heated growth media/GM (GM; Ham's F10 nutrient mix supplemented with 10%  
159 hi-NCS, 10% hi-FBS, 100 U/ml penicillin, 100 µg/ml streptomycin, 2.5 µg/ml amphotericin B and 5 mM L-  
160 glutamine). Once confluent, cells were trypsinised and reseeded into larger T75's to expand the cell  
161 population. Human derived muscle cells (HMDCs) were seeded onto gelatin coated 6 well plates, at a density  
162 of  $9 \times 10^5$  cells/ml in 2 ml of GM for until ~90% confluency was attained (~48 h). GM was removed, and cells  
163 underwent 3 × PBS washes before switching to low serum differentiation media (DM; Ham's F10 nutrient mix  
164 supplemented with 2% hiFBS, 100 U/ml penicillin, 100 µg/ml streptomycin, 2.5 µg/ml amphotericin B and 5  
165 mM L-glutamine). HMDCs were differentiated for a total of 10 days (d) which received a 1 ml top up of DM  
166 at 72 h and 7 d timepoints. Cells were lysed for DNA and RNA at 0 h (30 minutes in DM), 72 h, 7 d and 10 d.  
167 All experiments were carried out below passage 10 to prevent senescence. We undertook methylation arrays  
168 on DNA isolated from: 0 h young (n = 7), 0 h aged (n = 4), 72 h young (n = 7), 72 h aged (n = 4), 7 d young (n  
169 = 6), 7d aged (n = 3), 10 d young (n = 2) and 10 d aged (n= 4). Gene expression was analysed using young (n  
170 = 4, 7 d) and aged (n = 3, 7 d) cells. It's worth noting that we had n= 3-4 for most conditions, however in the  
171 10 d young cells condition, the DNA did not pass QA/QC for the arrays, and we had no cells left for these  
172 participants. Therefore, unfortunately we could only run n = 2 for this single condition. Therefore, results for  
173 this condition should be viewed with this caveat in mind. A schematic of experimental design can be found  
174 in Suppl. Figure 1.

175

### 176 *Myogenicity and morphology measurements*

177 Following isolations, attached single cells were fixed prior to staining and fluorescent immunocytochemistry  
178 analysis to determine myogenicity (via desmin positivity) of the isolated young and aged muscle derived  
179 cultures. Briefly, approximately  $2 \times 10^4$  cells were seeded onto 3 × wells of a 6-well plate and were incubated  
180 for 24 h in GM. Existing media was removed and cells were washed 3 × in PBS before fixation using the graded  
181 methanol/acetone method (50:25:25 TBS:methanol:acetone for 15 minutes followed by 50:50

182 methanol:acetone) after which cells were permeabilised in 0.2% Triton X-100 and blocked in 5% goat serum  
183 (Sigma-Aldrich, UK) in TBS for 30 minutes. Cells were washed 3 × in TBS and incubated overnight (4 °C) in 300  
184 µl of TBS (with 2% goat serum and 0.2% Triton X-100) containing primary anti-desmin antibody (1:50;  
185 ab15200, Abcam, UK). After overnight incubation, cells were washed 3 × in TBS and incubated at RT for 3 h  
186 in 300 µl of secondary antibody solution (TBS, 2% goat serum and 0.2% Triton X-100) containing the  
187 secondary antibody, anti-rabbit TRITC (1:75; T6778, Sigma-Aldrich, UK) to counterstain desmin. Finally, cells  
188 were washed again 3 × in TBS, prior to counterstaining nuclei using 300 µl of DAPI solution at a concentration  
189 of (300 nM; D1306, Thermo Fisher Scientific, UK) for 30 minutes. Immunostained cells were then visualised  
190 using a fluorescent microscope (Nikon, Eclipse Ti-S, Japan or Olympus IX83, Japan) and imaged using  
191 corresponding software (Nikon, NIS Elements and Olympus FV10-ASW 4.2). Myoblasts, myotubes and nuclei  
192 were visualized using TRITC (Desmin, Excitation: 557 nm, Emission: 576 nm) DAPI (Excitation: 358 nm,  
193 Emission: 461 nm) filter cubes. All immunostained samples were imported to Fiji/ImageJ (version 2.0.0)  
194 software for subsequent calculations. Note, there was no difference ( $p = 0.86$ ) in myogenic cell proportions  
195 in aged ( $35 \pm 5\%$ ) versus young cells ( $34 \pm 9\%$ ). Therefore, the aged and young muscle derived cells were  
196 matched for their desmin positivity (% myoblasts) prior to differentiation experiments and downstream DNA  
197 methylation and gene expression analysis. To determine myotube differentiation and formation at each time  
198 point, cells were imaged using light microscopy (Olympus, CKX31, Japan) at 0, 72 h, 7 and 10 d of  
199 differentiation.

200

#### 201 *DNA isolation and bisulfite conversion*

202 Prior to DNA isolation, tissue samples were homogenized for 45 seconds at 6,000 rpm × 3 (5 minutes on ice  
203 in between intervals) in lysis buffer (180 µl buffer ATL with 20 µl proteinase K) provided in the DNeasy spin  
204 column kit (Qiagen, UK) using a Roche Magnalyser instrument and homogenization tubes containing ceramic  
205 beads (Roche, UK). DNA was then isolated using the DNAeasy kit (Qiagen, UK) according to manufacturer's  
206 instructions. Cells were lysed in 180 µl PBS containing 20 µl proteinase K, scraped from wells, and then  
207 isolated using DNAeasy kits (Qiagen, UK) as above with the tissue lysates. The DNA was then bisulfite  
208 converted using the EZ DNA Methylation Kit (Zymo Research, CA, United States) as per manufacturer's  
209 instructions.

210

#### 211 *Infinium MethylationEPIC BeadChip Array*

212 All DNA methylation experiments were performed in accordance with Illumina manufacturer instructions for  
213 the Infinium MethylationEPIC 850K BeadChip Array (Illumina, USA). Methods for the amplification,  
214 fragmentation, precipitation and resuspension of amplified DNA, hybridisation to EPIC beadchip, extension  
215 and staining of the bisulfite converted DNA (BCD) can be found in detail in our open access methods paper  
216 <sup>49</sup>. EPIC BeadChips were imaged using the Illumina iScan<sup>®</sup> System (Illumina, United States).

217



218 *DNA methylation analysis, CpG enrichment analysis (GO and KEGG pathways), differentially modified region*  
219 *analysis and Self Organising Map (SOM) profiling*

220 Following DNA methylation quantification via MethylationEPIC BeadChip array, raw .IDAT files were  
221 processed using Partek Genomics Suite V.7 (Partek Inc. Missouri, USA) and annotated using the  
222 MethylationEPIC\_v-1-0\_B4 manifest file. We first checked the average detection p-values. The highest  
223 average detection p-value for the samples was 0.0023 (Suppl. Figure **2a**), which is well below the  
224 recommended 0.01 in the Oshlack workflow<sup>51</sup>. We also produced density plots of the raw intensities/signals  
225 of the probes (Suppl. Figure **2b**). These demonstrated that all methylated and unmethylated signals were  
226 over 11.5 (mean was 11.52 and median was 11.8), and the difference between median methylation and  
227 median unmethylated signal was 0.56<sup>51</sup>. Upon import of the data into Partek Genomics Suite we removed  
228 probes that spanned X and Y chromosomes from the analysis due to having both males and females in the  
229 study design, and although the average detection p-value for each samples was on average very low (no  
230 higher than 0.0023) we also excluded any individual probes with a detection p-value that was above 0.01 as  
231 recommended in<sup>51</sup>. Out of a total of 865,860 probes, removal of the X&Y chromosome probes and those  
232 with a detection p-value above 0.01 reduced the probe number to 846,233 (removed 19,627 probes). We  
233 also filtered out probes located in known single-nucleotide polymorphisms (SNPs) and any known cross-  
234 reactive probes using previously defined SNP and cross-reactive probe lists identified in earlier 850K  
235 validation studies<sup>52</sup>. This resulted in a final list of 793,200 probes to be analysed. Following this, background  
236 normalisation was performed via functional normalisation (with noob background correction), as previously  
237 described<sup>53</sup>. Following functional normalisation, we also undertook quality control procedures of principle  
238 component analysis (PCA), density plots by lines as well as box and whisker plots of the normalised data for  
239 tissue samples (Suppl. Figures **2c, d, e** respectively) and cell samples (Suppl. Figures **2 f, g, h** respectively).  
240 Any outlier samples were detected using PCA and the normal distribution of  $\beta$ -values. Outliers were then  
241 removed if they fell outside 2 standard deviations (SDs) (e.g. Suppl. Figure **2c**) of the ellipsoids and/or if they  
242 demonstrated different distribution patterns to the samples of the same condition. Only one young adult  
243 male tissue sample was removed due to being outside 2 standard deviations outside samples from the same  
244 condition (Suppl. Figure **2c**; sample with a strikethrough line). Following normalisation and quality control  
245 procedures, we undertook differential methylation analysis by converting  $\beta$ -values to M-values (M-value =  
246  $\log_2(\beta / (1 - \beta))$ ), as M-values show distributions that are more statistically valid for the differential analysis  
247 of methylation levels<sup>54</sup>. We undertook a 1-way ANOVA for comparisons of young and aged skeletal muscle  
248 tissue. For primary human muscle cells, we undertook a 2-way ANOVA for age (young vs. aged cells) x time  
249 (0, 72 h, 7 and 10 d) and also explored the ANOVA main effects for both age and time independently. We  
250 also performed planned contrasts within the differentiation time-course in both young adult cells alone and  
251 aged cells alone e.g. 0 h vs. 72 h, 0 h vs. 7 d 0 h vs. 10 d, as well as planned contrasts for young vs aged cells  
252 at each time point of differentiation (0 h vs. 0 h, 72 h vs. 72 h, 7 d vs. 7 d, 10 d vs. 10 d in aged vs. young adult  
253 cells respectively). Any CpG with a False Discovery Rate (FDR)  $\leq 0.05$  was deemed significant. In some

254 analyses, e.g. > 100,000 differentially methylated CpG sites were identified at  $FDR \leq 0.05$ , so we also show  
255 results at a more stringent FDR of  $\leq 0.01$  or 0.001, or at FDR of  $\leq 0.05$  and 'a change (difference in M-value)  
256 in methylation greater than 2'. These shorter lists of CpGs contain the most significant sites to enable sensible  
257 pathway analysis. We specify when a more stringent FDR than 0.05 was used in the results text. We then  
258 undertook CpG enrichment analysis on these differentially methylated CpG lists within gene ontology and  
259 KEGG pathways<sup>55, 56, 57</sup> using Partek Genomics Suite and Partek Pathway. We also undertook differentially  
260 methylated region analysis (e.g. identifies where several CpGs are consistently differentially methylated  
261 within a short chromosomal location/region) using the Bioconductor package DMRcate  
262 (DOI: [10.18129/B9.bioc.DMRcate](https://doi.org/10.18129/B9.bioc.DMRcate)). Finally, in order to plot temporal changes in methylation across the time-  
263 course of muscle cell differentiation we undertook Self Organising Map (SOM) profiling of the change in mean  
264 methylation within each condition using Partek Genomics Suite.

265

#### 266 *RNA isolation, primer design & gene expression analysis*

267 Skeletal muscle tissue muscle was homogenised in tubes containing ceramic beads (MagNA Lyser Green  
268 Beads, Roche, Germany) and 1 ml Tri-Reagent (Invitrogen, Loughborough, UK) for 45 seconds at 6,000 rpm  $\times$   
269 3 (and placed on ice for 5 minutes at the end of each 45 second homogenization) using a Roche Magnalyser  
270 instrument (Roche, Germany). Human cells from differentiation experiments were also lysed in 300  $\mu$ l Tri-  
271 Reagent for 5 minutes at RT mechanically dissociated/lysed using a sterile scraper. RNA was then isolated as  
272 per Invitrogen's manufacturer's instructions for Tri-reagent. Then a one-step RT-PCR reaction (reverse  
273 transcription and PCR) was performed using QuantiFast<sup>TM</sup> SYBR Green RT-PCR one-step kits on a Rotorgene  
274 3000Q. Each reaction was setup as follows; 4.75  $\mu$ l experimental sample (7.36 ng/ $\mu$ l totalling 35 ng per  
275 reaction), 0.075  $\mu$ l of both forward and reverse primer of the gene of interest (100  $\mu$ M stock suspension), 0.1  
276  $\mu$ l of QuantiFast RT Mix (Qiagen, Manchester, UK) and 5  $\mu$ l of QuantiFast SYBR Green RT-PCR Master Mix  
277 (Qiagen, Manchester, UK). Reverse transcription was initiated with a hold at 50°C for 10 minutes (cDNA  
278 synthesis) and a 5-minute hold at 95°C (transcriptase inactivation and initial denaturation), before 40-50 PCR  
279 cycles of; 95°C for 10 sec (denaturation) followed by 60°C for 30 sec (annealing and extension). Primer  
280 sequences for genes of interest and reference genes are included in Table 1. All genes demonstrated no  
281 unintended targets via BLAST search and yielded a single peak after melt curve analysis conducted after the  
282 PCR step above. All relative gene expression was quantified using the comparative Ct ( $\Delta\Delta$ Ct) method<sup>58</sup>. For  
283 human cell differentiation analysis via measurement of myoD and myogenin, a pooled mean Ct for the 0 h  
284 young adult control samples were used as the calibrator when comparing aged vs. young adult cells. This  
285 approach demonstrated a low % variation in  $C_t$  value of 9.5 and 8.5% for myoD and myogenin, respectively.  
286 For HOX gene analysis between young and aged tissue and for the 7 d aged cells vs. 7 d young adult cells, the  
287 mean Ct of the young adult cells were used as the calibrator. The average, standard deviation and variations  
288 in Ct value for the B2M reference gene demonstrated low variation across all samples (mean  $\pm$  SD, 13.12  $\pm$   
289 0.98, 7.45% variation) for the analysis of myoD and myogenin. For HOX gene analysis, the RPL13a reference



290 gene variation was low in the human tissue ( $17.77 \pm 1.71$ , 9.6% variation) and stem cell ( $15.51 \pm 0.59$ , 3.82%  
291 variation) experiments. The average PCR efficiencies of myoD and myogenin were comparable ( $94.69 \pm 8.9\%$ ,  
292 9.4% variation) with the reference gene B2M ( $89.45 \pm 3.76\%$ , 4.2% variation). The average PCR efficiencies  
293 of the all genes of interest in the tissue analysis of the HOX genes were also comparable ( $90.87 \pm 3.17\%$ ,  
294 3.39% variation) with the human reference gene RPL13a ( $92 \pm 2.67\%$ , 2.9% variation). Similarly, for the cell  
295 analysis, HOX genes of interest efficiencies were comparable ( $89.59 \pm 4.41\%$ , 4.93% variation 4.93%) with the  
296 reference gene RPL13a ( $89.57 \pm 3.55\%$ , 3.97% variation). Statistical analysis for HOX genes was performed  
297 using t-tests (aged tissue vs. young tissue and 7d aged versus 7d young).

298

### 299 *Physical Activity and DNA methylation*

300 The human association study involved 30 physically active and endurance-oriented men of Eastern European  
301 descent ( $32.9 \pm 9.9$  years). The study was approved by the Ethics Committee of the Physiological Section of  
302 the Russian National Committee for Biological Ethics and Ethics Committee of the Federal Research and  
303 Clinical Center of Physical-chemical Medicine of the Federal Medical and Biological Agency of Russia. Written  
304 informed consent was obtained from each participant. The study complied with the guidelines set out in the  
305 Declaration of Helsinki. Physical activity was assessed using questionnaire. Participants were classified as  
306 mildly active (1-2 training sessions per week, n=6), moderately active (3-4 training sessions per week, n=8)  
307 and highly active (5-7 sessions per week, n=16) participating in aerobic exercise for at least the last 6 months.  
308 Bisulfite conversion of genomic DNA was performed using the EpiMark® Bisulfite Conversion Kit in  
309 accordance with the manufacturer's instructions. In the same analysis as described above for the aged muscle  
310 tissue and stem cell data, methylome of the vastus lateralis in the physically active men was evaluated using  
311 the Infinium MethylationEPIC 850K BeadChip Array (Illumina, USA) and imaged and scanned using the  
312 Illumina iScan® System (Illumina, United States). Also as in the above analysis we filtered out probes located  
313 in known single-nucleotide polymorphisms (SNPs) and any known cross-reactive probes using previously  
314 defined SNP and cross-reactive probe lists<sup>59</sup>. Low quality probes were also filtered, as with the above  
315 analysis. The final analyses included 796,180 of 868,565 probes. Data were normalised using the same  
316 functional normalisation (with noob background correction), as in the aged tissue and stem cell data, and as  
317 previously described<sup>53</sup>. Any outliers were interrogated via PCA as above, however all samples passed the QC  
318 and therefore there were no outliers. The methylation level of each CpG-site after normalization and filtering  
319 processes was represented as a  $\beta$ -value ranging from 0 (unmethylated) to 1 (fully methylated) in order to  
320 undertake multiple regression (as regression analysis performed better with finite values. Ideally, if values  
321 range from 0 to 1 with beta-values satisfying this criteria). Statistical analyses were conducted using PLINK  
322 v1.90, R (version 3.4.3) and GraphPad InStat (GraphPad Software, Inc., USA) software. Multiple regression  
323 was used for testing associations between the CpG-methylation level and physical activity adjusted for age  
324 and muscle fibre composition. With methylation level as the dependent variable, and physical activity and  
325 age as independent variables. P values < 0.05 were considered statistically significant to test the identified

326 HOX CpG sites. The p value is given for the physical activity score adjusted for age and muscle fibre  
327 composition.

328

## 329 **Results**

330

### 331 *Aged human skeletal muscle tissue is hypermethylated compared with young adult tissue*

332 There were 17,994 differentially methylated CpG positions (DMPs) between aged and young adult tissue at  
333  $FDR \leq 0.05$  (Suppl. File **1a**), and 6,828 DMPs at a more stringent  $FDR$  of  $\leq 0.01$  (Suppl. File **1b**). The  
334 overwhelming majority of the 6,828 DMPs (93%) were hypermethylated in aged compared with young  
335 muscle (Figure **1a**). Furthermore, DMPs were enriched in CpG islands (5,018 out of 6,828 CpG's) with the  
336 remaining in N-shores (354), S-Shelf (48), S-Shores (341), S-Shelf (69) and 'other' (998). Ninety nine percent  
337 of the DMPs (4,976 out of the 5,018 CpGs) located in CpG islands were also hypermethylated with age  
338 compared to young adult tissue (Suppl. File **1c**). After gene ontology analysis on these DMPs (Suppl. File **1d**),  
339 hypermethylation was enriched within the three overarching gene ontology terms: 'Biological process'  
340 (Suppl. Figure **3a**), 'cellular component;' (Suppl. Figure **3b**), and 'molecular function' (Suppl. Figure **3c**). Within  
341 the GO terms that included the search term 'muscle', the most significantly enriched was 'regulation of  
342 muscle system process' (Figure **1b**, CpG list Suppl. File **1e**). Within this GO term was 'regulation of muscle  
343 contraction' (CpG list Suppl. file **1f**). Further, we found hypermethylation enrichment in KEGG pathways:  
344 'Pathways in cancer', 'Rap1 signaling', 'Axon guidance' and 'Hippo signaling' (Suppl. File **1g**). Within the top  
345 enriched pathway, 'pathways in cancer', 96% (266 out of 277 CpGs) were hypermethylated and only the 4%  
346 (11 CpGs) were hypomethylated in aged compared with young adult muscle tissue (Suppl. Figure **4**; Suppl.  
347 File **1h**). Differentially methylated regions (DMRs) were also analysed between young and aged skeletal  
348 muscle tissue (Suppl. File **1i**). The top 5 DMRs were identified as: chr8:22422678-22423092 (415 bp) within a  
349 CpG island of the SORBS3 gene with 6 CpG's that were all hypermethylated in aged versus young adult tissue.  
350 Also, chr6:30653732-30655720 (1989 bp) within a CpG island of the PPPR1 gene contained 8 CpG's that were  
351 all hypermethylated compared with young adult muscle. Chr20:13200939-13202437 (1499 bp) within a CpG  
352 island of the promoter of gene ISM, contained 8 CpG sites were also all hypermethylated. Similarly, the gene  
353 PDE4D1P on Chr1:144931376-144932480 (1105 bp) contained 6 CpG sites that spanned its promoter within  
354 a CpG island, once again demonstrating hypermethylation. The only gene demonstrating the opposite  
355 direction in methylation status (hypomethylation) in aged tissue was the gene C1orf132 (new gene name  
356 MIR29B2CHG), also on chromosome 1 (Chr1:207990896-207991936; 1041 bp), where 5 CpGs within this  
357 region were hypomethylated in opposition to the majority of gene regions that were hypermethylated in  
358 aged versus young tissue.

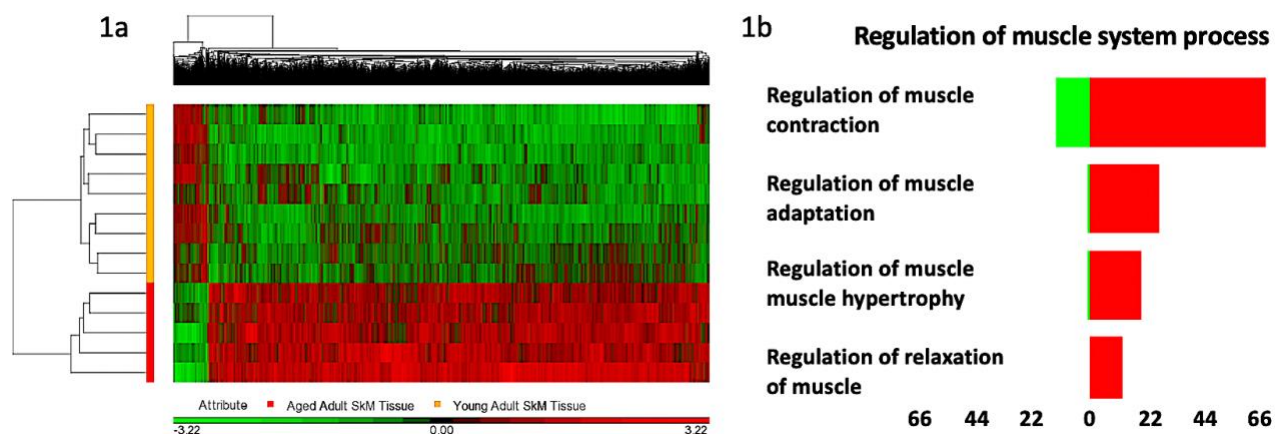

359

360

361

362

363

364

365

366

367

368

369

370

371

372

373

374

375

376

377

378

379

380

381

382

383

384

**Figure 1. DNA methylation across the genome in aged human skeletal muscle tissue compared with young adult tissue. 1a.** Hierarchical clustering heatmap of the significantly differentially methylated CpG sites, depicting aged skeletal muscle containing a hypermethylated (RED) versus hypomethylated (GREEN) signature compared with young adult tissue. **1b.** Significantly enriched CpG sites for most significantly enriched GO term containing the search term ‘muscle’; ‘regulation of muscle system process’ (RED hypermethylated and GREEN hypomethylated CpGs).

*Aged primary human muscle stem cells displayed more varied DNA methylation signatures versus young adults during the time-course of differentiation*

We analysed DNA methylation from differentiating human muscle stem cells at 0 h (30 minutes post dropping to 2% serum), 72 h, 7 and 10 d. Both young and aged adult cells demonstrated morphological differentiation and myotube formation as the cells advanced across the time-course (Figure **2a**). This was confirmed by increases in myoD and myogenin mRNA expression in both young and aged cells as differentiation progressed up to 72hrs (Figure **2b**). However, myotube formation was less extensive in elderly cells, despite young and aged cells having identical numbers of starting myogenic cells. This age associated reduction in differentiation was confirmed with significantly reduced myoD and myogenin gene expression at 72 h and 10 d ( $p \leq 0.05$ ), as well as by delayed increases in myogenin mRNA expression (Figure **2b**) in aged cells. A similar delay has been shown previously to be associated with impairing the fusion process and myotube formation<sup>32,33</sup>. There were also differences in DNA methylation between aged and young cells during differentiation. Indeed, the interaction for a 2-way ANOVA (Age  $\times$  Time) generated a list of 40,854 CpG sites that were significantly altered with age and across the time-course of differentiation (FDR  $\leq 0.05$ , Suppl. File **2a**). With a more stringent FDR  $\leq 0.01$  and  $\leq 0.001$  there were still 9,938 and 2,020 CpG’s significantly differentially methylated respectively in aged cells versus young cells across all time points of differentiation (Suppl. File **2b** and **2c** respectively).

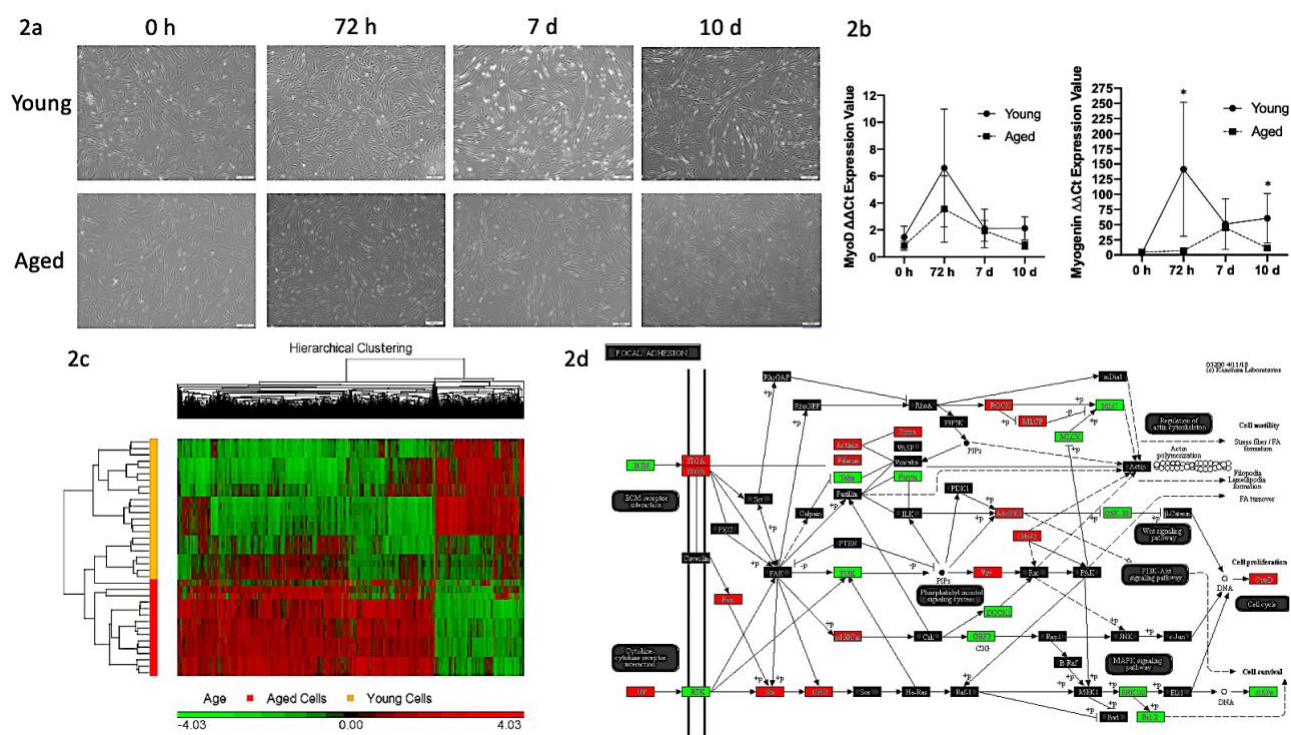

385

386

387

388

389

390

391

392

393

394

395

396

397

398

399

400

401

402

403

404

405

406

407

408

409

410

**Figure 2. Aged and young adult primary muscle derived stem cells differentiated over 0, 72 h, 7d and 10 d and differences in DNA methylation.** **a.** Light microscope images of aged versus young muscle derived stem cells, depict fewer myotubes in aged versus young cells, particularly at 7 and 10 days. **b.** MyoD and myogenin gene expression in aged versus young cells over the differentiation time course. Where, reductions in myogenin were observed at 72 h in aged cells as well as a delayed increase in the upregulation of myogenin compared with young cells. **c.** Hierarchical clustering heatmap of the significantly differentially methylated CpG sites between aged and young muscle stem cells across the entire time-course of differentiation (all time points of 0, 72 h, 7 d and 10 d). RED hypermethylated and GREEN hypomethylated. **d.** Comparison of DNA methylation in aged versus young muscle stem cells at 7 d of differentiation (7 d aged vs. 7 d young adult cells) in most enriched KEGG pathway, ‘focal adhesion’. Note, because some genes have multiple CpGs per gene, Partek Pathway (Partek Genomics Suite) used to create figure 2d, selects the CpG with the lowest p-value (most significant) and uses the beta-value for that particular CpG to colour the pathway diagram. This is therefore accurate in situations where CpGs on the same gene have the same methylation pattern (e.g. all hyper or hypomethylated). However, where multiple CpGs on the same gene have the different methylation pattern (e.g. some hypomethylated and others hypermethylated), only the most significant methylated CpG is chosen and represented in the image. For full and accurate significant CpG lists, including the sites that were hypo and hypermethylated in this ‘focal adhesion’ pathway, are included in Suppl. File 5i.

We next assessed changes in DNA methylation across time during differentiation (main effect for ‘time’) i.e. changes in DNA methylation overtime time that was visible in both young and old cells). However, we did not find time-related DMPs at our statistical cut off of  $\text{FDR} \leq 0.05$ . This suggested, that DNA methylation was not considerably changing over the time course of muscle stem cell differentiation itself. We therefore contrasted each timepoint of differentiation with the baseline (0 h timepoint) in young and aged cells to further examine this observation. Indeed, in young adult cells, there were only 1 and 14 DMPs at 72 h and 10 d respectively ( $\text{FDR} \leq 0.05$ ), and no DMPs at 7 d ( $\text{FDR} \leq 0.05$ ) compared to their baseline 0 h timepoint. In aged cells, there were no DMPs during early differentiation (72 h vs. 0 h,  $\text{FDR} \leq 0.05$ ) but 2,785 significant DMPs at 7 days of differentiation (7d vs. 0 h,  $\text{FDR} \leq 0.05$ , Suppl. file 2d) and 404 DMPs at 10 days of differentiation (10 d vs. 0 h,  $\text{FDR} \leq 0.05$ , Suppl. File 2e). Therefore, while the differentiation itself was not



411 changing DMPs in young cells there were a significant number of DMPs at 7 days of differentiation in aged  
412 cells compared with their own 0 h timepoint. Using more stringent cut-offs ( $FDR \leq 0.05$  and  
413 change/difference in methylation greater than 2), at this 7-day time point in aged cells there were 1,229  
414 DMPs at 7 d vs 0 h (Suppl. File **2f**), with a balanced number of hypo and hypermethylated DMPs. Overall, this  
415 may suggest a more dysfunctional DNA methylation program during differentiation in aged human muscle  
416 cells compared with young cells. Conducting gene ontology analyses at this 7 day time point (Suppl. File **2g**),  
417 it suggested that this varied methylation response in aged cells was enriched in GO terms: 'regulation of  
418 localisation', 'regulation of cell communication' and 'regulation of signaling' (Suppl. Figure **5**; Suppl. File **2h**,  
419 **i**, **j** respectively). CpGs within these ontologies also confirmed that there was a similar hypo and  
420 hypermethylation profile in aged cells at 7 days. Further, KEGG pathway analysis suggested the top enriched  
421 pathways at 7 days in aged cells versus 0 h were: 'axon guidance', 'cholinergic synapse', 'adrenergic signaling  
422 in cardiomyocytes' and 'circadian entrainment' (Suppl. File **2k**). Finally, DMR analysis between young and  
423 aged cells at 7 days of differentiation identified two regions in 2 genes that had 5 or more CpG sites  
424 significantly differentially methylated (Suppl. File **2l**). The first being Chr3:155394096-155394303 (209 bp)  
425 located on gene PLCH1 that had 5 of its CpG's hypomethylated. The second being a region non-annotated in  
426 location Chr2: 119615888-119617128 (1241 bp) that was hypermethylated on 5 CpG's. Suggesting that  
427 enriched and varied methylation of these regions occurred at 7 d differentiation in aged cells that was not  
428 detected at 7 days in young adult cells.

429

430 *Aged muscle cells demonstrate hypermethylated signatures versus young muscle cells across differentiation,*  
431 *particularly at 7 days*

432 We next wished to identify differences in DNA methylation in aged versus young muscle stem cells. The main  
433 effect for 'age' generated a significant differentially methylated ( $FDR \leq 0.05$ ) CpG list of 269,898 sites that  
434 significantly varied in aged cells versus young cells. Even with a more stringent cut-off ( $FDR \leq 0.01$ ) there  
435 were still 159,235 sites significantly modified (Suppl. File **3a**). Increasing the stringency to a difference of  
436 greater than 2 while keeping an  $FDR \leq 0.01$  identified 2,719 DMPs with the most highly significant and  
437 demonstrated the largest differences between aged and young cells (Suppl. File **3b**). As with the aged versus  
438 young skeletal muscle tissue analysis, the majority of these significantly modified CpG sites in aged cells were  
439 hypermethylated (2,017 out of 2,719) versus hypomethylated (702 out of 2,719) compared with young cells,  
440 visualised in hierarchical clustering aged cells vs. young cells (Figure **2c**). Two hundred and eleven out of these  
441 2,719 CpGs were located in islands and 97 were promoter associated. Gene ontology identified that aged  
442 cells demonstrated this significantly enriched hypermethylated profile in GO terms: 'developmental process',  
443 'anatomical structure development', 'anatomical structure morphogenesis' (Suppl. File **3c**) and also in KEGG  
444 pathways 'axon guidance', 'adherens junction', 'calcium signaling', 'focal adhesion' and 'protein digestion and  
445 absorption' (Suppl. File **3d**). DMR analysis (Suppl. File **3e**) identified that a non-coding location on  
446 chr12:115134344-115135576 (1233 bp) that contained 13 CpG's that were hypermethylated in aged cells

447 versus young cells. Further, there were 7 CpG's that were hypermethylated in the region of the gene LY6G5C  
448 (Chr6:31650736-31651158, 423 bp). There was also region containing 8 CpGs of the HOXC10 gene just  
449 upstream of HOXC6 and MIR196 (Chr12:54383692-54385621, 1933 bp) that all demonstrated a  
450 hypomethylated profile in aged cells vs. young cells. Interestingly, on the same chromosome just upstream  
451 of the HOXC10 gene (Chr12:54376020-54377868, 1849 bp), within the lncRNA HOXC-AS3, there were  
452 another 6 CpGs that were hypomethylated in aged cells versus young cells. The concentration of  
453 hypomethylated CpGs in aged versus young cells in HOXC genes is interesting given the majority of CpG's,  
454 more generally, were hypermethylated in aged cells versus young cells. A finding that is taken further in the  
455 later results section below.

456

457 Given these changes, predominantly favouring hypermethylation (except the HOXC genes identified above)  
458 in aged cells versus young cells, we also performed contrasts between aged and young adult cells at each  
459 time point of differentiation. When we compared 0 h aged cells with young adult cells at 0 h, we identified  
460 738 DMPs between young and old cells ( $FDR \leq 0.05$ , with a difference/change greater than 2), 79% of which  
461 were hypermethylated in aged versus young cells (Suppl. File **3f**). Gene ontology analysis (Suppl. File **3g**)  
462 revealed that the DMPs were in genes enriched for 'cytoskeletal protein binding' (Suppl. Figure **6a**; Suppl.  
463 File **3h**), 'developmental process', 'cell junction', 'cytoskeleton' and 'actin binding' (Suppl. File **3i, j, k, l**  
464 respectively). KEGG pathway analysis of 0 h aged versus 0 hr young adult cells (Suppl. File **3m**) also suggested  
465 that there were significantly enriched hypermethylated pathways for 'Axon Guidance' (Suppl. Figure **6b**; CpG  
466 List Suppl. File **3n**), 'Insulin secretion', 'Phospholipase D signaling', 'cAMP signaling pathway' and  
467 'Aldosterone synthesis and secretion' (Suppl. Files **3o, p, q, r** respectively). At 72 h d, there were 1,418 DMPs  
468 between aged and young adult cells ( $FDR \leq 0.05$ ), and with a difference/change greater than 2 there were  
469 645 significant CpG sites between aged and young adult cells (Suppl. File **4a**), 74% of which were  
470 hypermethylated in aged vs. young cells. Gene ontology analysis (Suppl. File **4b**) revealed that the DMPs were  
471 in genes enriched for 'cytoskeletal protein binding' (Suppl. Figure **6c**; Suppl. File **4c**), 'actin binding' (Suppl.  
472 File **4d**), 'cytoskeleton' and 'development process' as most significantly enriched, followed by 'regulation of  
473 signaling' (Suppl. Files **4e, f, g** respectively). KEGG pathway analysis (Suppl. File **4h**) showed enrichment for  
474 'Insulin secretion' (Suppl. File **4i**), 'aldosterone synthesis and secretion' (Suppl. File **4j**) and 'cAMP signaling  
475 pathway' (Suppl. Figure **6d**, Suppl. Files **4k**).

476

477 It was at 7 d of differentiation that we identified the largest number of DMPs between young and old cells  
478 (5,524 DMPs at  $FDR \leq 0.05$ , with a difference/change greater than 2, Suppl. File **5a**). 74% of DMPs were  
479 hypermethylated in aged vs. young cells. Gene ontology analysis (Suppl. File **5b**) revealed that DMPs were in  
480 genes enriched for 'developmental process' (Suppl. Figure **7a**, Suppl. File. **5c**) 'anatomical structure  
481 morphogenesis' (Suppl. File **5d**), 'neuron part', 'cytoskeletal protein binding' and 'cell junction' (Suppl. File **5**  
482 **e, f, g**). KEGG analysis (Suppl. File **5h**) identified: 'Focal adhesion' (Figure **2d**; Suppl. file **5i**), 'adherens junction'



483 (Suppl. File **5j**), 'regulation of actin cytoskeleton' (Suppl. File **5k**), 'cGMP-PKG signaling pathway' (Suppl. File  
484 **5l**), 'rap1 signaling pathway' (Suppl. File **5m**), as well as the muscle differentiation pathway of 'PI3K-Akt  
485 signaling pathway' (Suppl. Figure **7b**, Suppl. File **5n**). Among the DMRs at 7 d (Suppl. File **5o**) was a region  
486 within *HOXB1*, containing 8 hypermethylated CpGs in aged vs. young cells. We also identified to be  
487 hypermethylated in differentiation in aging cells only at 7 days, the gene *LY6G5C*, this time spanning a slightly  
488 larger region Chr6:31650736-31651362, of 627 bp (vs. Chr6:31650736-31651158, 423 bp in the above  
489 analysis), confirming that 6 of its CpG's were hypermethylated at 7 d compared with young adult cells at the  
490 same time point. At 10 d, we identified 288 DMPs (FDR  $\leq 0.05$  with a change greater than 2, Suppl. File **6a**),  
491 89% of which were hypermethylated in aged vs. young cells. Gene ontology analysis (Suppl. File **6b**) revealed  
492 that the DMPs were in genes enriched for 'GDP binding' (Suppl. Figure **7c**, Suppl. File **6c**), 'phosphotransferase  
493 activity', 'positive regulation of antigen receptor', 'mesoderm morphogenesis' and 'actin binding' (Suppl. File  
494 **6d, e, f, g** respectively). KEGG analysis (Suppl. File **6h**) identified 'Regulation of actin cytoskeleton' (Suppl.  
495 Figure **7d**; Suppl. File **6i**), 'ErbB signaling pathway' (Suppl. File **6j**) and 'Selenocompound metabolism' (Suppl.  
496 File **6k**).

497

498 *Self-organising map (SOM) profiling of aged muscle stem cells confirm a varied methylation profile in aged*  
499 *cells compared with young cells*

500 In order to further analyse temporal dynamics in methylation over the time course of differentiation in aged  
501 versus young cells, we conducted SOM profiling analysis of the 2,719 DMPs generated above (Suppl. File **3b**  
502 above, those highly significant for 'age'). SOM analysis averages the methylation values for the group of  
503 samples within each condition to identify temporal profile changes in DMPs between aged and young cells  
504 over the time-course of differentiation. Aged cells demonstrated more varied DNA methylation changes  
505 earlier in the time-course of differentiation (between 72 h and 7 d) compared with young adult cells (Figure  
506 **3a**). When looking at aged cells temporal dynamics compared with young cells, out of the 2,719 DMPs in  
507 aged cells 1,504 were hypomethylated and 956 hypermethylated at 7 days (confirming the aged cells 'time'  
508 main effect analysis above). With only a small number of genes demonstrating this altered profile at 7 days  
509 in young cells (284 hypomethylated and 110 hypermethylated out of the 2,719 CpG list).

510

511 Finally, in order to identify common CpG changes between aged and young cells at each time point, the  
512 significantly differentially methylated DMPs from young vs. aged cells across all time were overlapped (2,719  
513 CpG list), with the 0 h aged vs. 0 h young (738 CpG list), 72 h aged vs. young 72 h (645 CpG list), 7 d aged vs.  
514 7 d young (5,524 CpG list), and the 10 d aged vs 10d young (288 CpG list) (Venn diagram, Figure **3b**). There  
515 were 24 genes that were identified across tissue and stem cell analysis that were significantly differentially  
516 methylated (Suppl. File **7a**). They included 24 CpG's on 16 genes: TSPAN9, RBM22, UBAP1, CAPZB, ZNF549,  
517 MBNL2, RMI1, CHRM5, RAB4A, C19orf21, MOBKL1A, ANAPC11, GAS7, PBX1, ELOVL2, FGGY. Furthermore,  
518 generating a SOM profile of temporal change in methylation over the time-course of differentiation in these

519 24 CpG's, (Figure 3c), also demonstrated that the majority of these DMPs in aged cells (16 out of 24 CpG's)  
 520 demonstrated varied methylation at 7 days (11 out of 16 CpGs on annotated genes: TSPAN9, RBM22, UBAP1,  
 521 CHRM5, C19orf21, ELOVL2, MOBKL1A, ANAPC11, PBX1, CAPZB, FGGY; fully detailed in Suppl. File 7a).

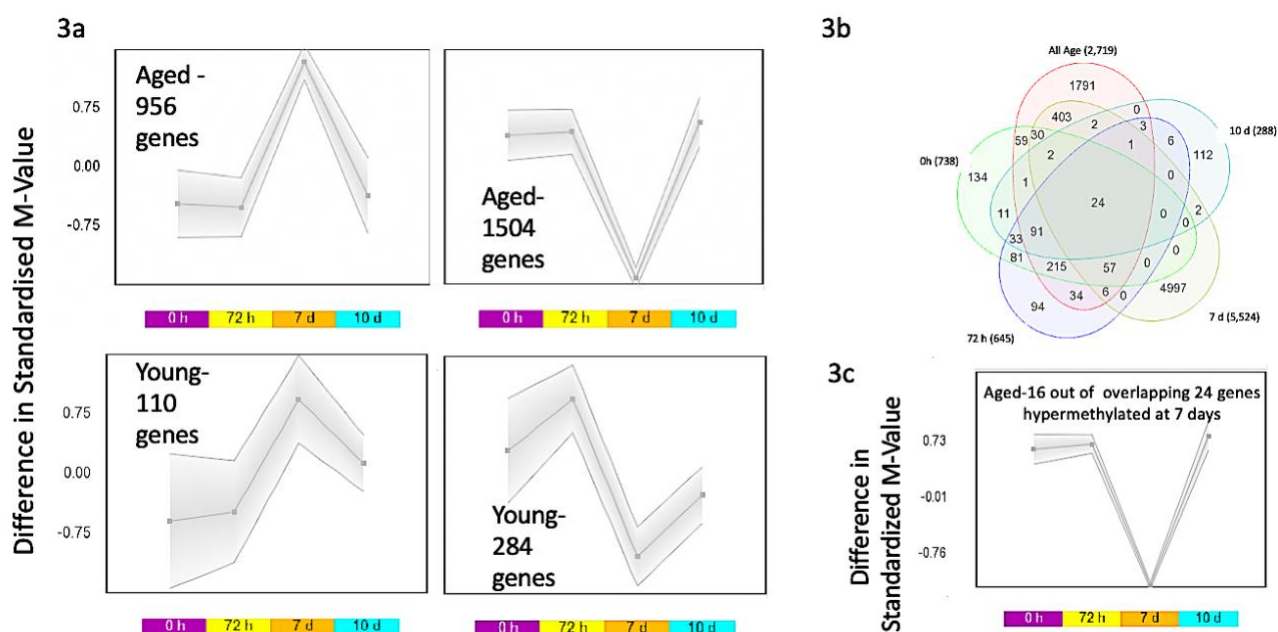

522  
 523 **Figure 3. SOM profiling of DNA methylation over the time-course of differentiation in aged versus young adult muscle stem cells.**  
 524 a. Demonstrates a larger number of hypomethylated and hypermethylated CpG sites in aged muscle stem cells, particularly at 7 days  
 525 of differentiation, compared with young adult muscle stem cells. b. Venn Diagram analysis depicting the 24 common CpG sites that  
 526 were altered at every time point of differentiation between aged and young adult muscle stem cells (0, 72 h, 7d and 10 d). c. As with  
 527 the above analysis in 3a, SOM profiling identified that 16 out of these 24 CpG's also demonstrated the most varied methylation  
 528 dynamics at 7 days of differentiation in aged cells.

529  
 530 *Distinguishing differentiation-specific CpG sites in aged cells versus those altered as a consequence of age*  
 531 *alone*

532 The data above suggest that aged cells demonstrate hypermethylation versus young adult cells across all  
 533 stages of differentiation, and that aged cells significantly altered their methylation profiles at 7 days of  
 534 differentiation. Therefore, we conducted further analysis on the overlap of DMPs within aged cells at 7 d of  
 535 differentiation (from the 'time' analysis above) and those that were changed as a consequence of age at 7  
 536 days (aged cells at 7 days versus young cells at 7 d). This enabled the identification of which methylation sites  
 537 were altered, but also shared in both aged cell differentiation alone and as a consequence of age. Or,  
 538 alternatively the sites that were simply changed with age and not differentiation process and vice versa.  
 539 Indeed, overlapping the aged cells 0 h vs. 7 d (1,229 DMP list) with the 7 d young cells significant 5,524 DMP  
 540 list, there were only 334 (206 hypermethylated, 128 hypomethylated) DMPs that were shared (Suppl. File.  
 541 8a). This suggested that differentiation itself modified only 334 DMPs (out of 1,229) in aged cells that were  
 542 also changed as a consequence of age (i.e. in aged vs. young cells at 7 days). The remaining 895 DMPs (1,229  
 543 - 334 DMPs; Suppl. File 8b) were differentiation specific to aged cells. Out of this 895 DMP list, an equal  
 544 number were hypo and hypermethylated (458 hypo and 437 hypermethylated). Therefore, this overlap

545 analysis also confirmed that data above, where over the time-course of aged cell differentiation itself the  
 546 methylome is both hypo and hyper methylated on a similar number of DMPs, whereas aging alone  
 547 predominantly hypermethylates (where out of 5,524 changed at 7 d young vs. aged, 4061 were  
 548 hypermethylated and only 1,463 hypomethylated). This also suggested that the remaining 5,190 (5,524  
 549 minus 334 DMP list, equalling 5,190 DMPs including 3,910 hypermethylated vs. 1,280 hypomethylated) were  
 550 as a consequence of aging alone (Suppl. File 8c).

551

552 *Hypermethylation for a small number of CpG sites is similarly altered in aged muscle cells in-vitro from the in-*  
 553 *vivo tissue niche.*

554 Tissue and cell PCA plots demonstrated that methylation of even late differentiated cells was vastly different  
 555 to tissue, suggesting that cell versus tissue samples were comprised of vastly different methylation profiles  
 556 (Suppl. Figure 8). Therefore, in order to compare if there were any sites similarly altered in the cells that were  
 557 also altered in the tissue with age, we overlapped the DMP lists from the tissue and cell analysis described  
 558 above. Six CpG's that were identified in the 6,828 significantly differentially methylated CpG list from the  
 559 aged versus young tissue analysis, as well as highlighted in the 2,719 list 'age' cells analysis (Figure 4). These  
 560 included: KIF15 (2 CpG's Cg00702638 & cg24888989), DYRK2 (cg09516963), FHL2 (cg22454769), MRPS33  
 561 (cg26792755), ABCA17P (cg02331561). All of these genes were hypermethylated in the tissue analysis as well  
 562 as the cells. Given that aged cells demonstrated the most varied methylation at 7 days versus young cells.  
 563 When comparing 7 d aged vs. 7 d young cell list (5,524 list), 4 CpG's (out of the 6 CpG sites identified above)  
 564 were also identified in the 6,828 tissue CpG list, including: MGC87042 (cg00394316), C2orf70 (cg23482427),  
 565 ABCA17P (cg02331561) and cg27209395 (not on an annotated gene). Once more, all of these CpG's (with the  
 566 exception of C2orf70, cg23482427) were hypermethylated in the tissue analysis as well as the cells. With  
 567 ABCA17P (cg02331561) highlighted across all gene lists (Figure 4).

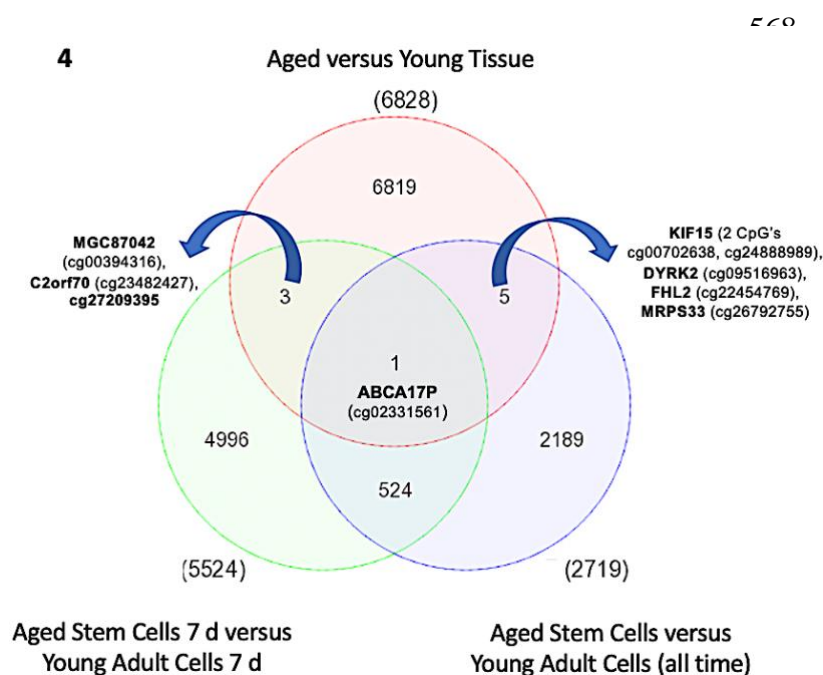

**Figure 4. Venn diagram of common overlapping CpG sites significantly differentially methylated between aged skeletal muscle tissue and muscle stem cells.** Overlap of the tissue and aged cells identified 6 common CpG sites on genes KIF15 (2 CpG's Cg00702638 & cg24888989), DYRK2 (cg09516963), FHL2 (cg22454769), MRPS33 (cg26792755) and ABCA17P (cg02331561). Given that aged cells demonstrated the most varied methylation at 7 days versus young cells. When overlapping the 7 d most significantly differentially methylated CpG lists, 4 CpG's (out of the 6 CpG sites identified above) were also identified, including: MGC87042

584 (cg00394316), C2orf70 (cg23482427), ABCA17P (cg02331561) and cg27209395 (not on an annotated gene). Once more, all of these  
585 CpG's (with the exception of C2orf70, cg23482427) were hypermethylated in the tissue analysis as well as the stem cells. With  
586 ABCA17P (cg02331561) highlighted across all CpG lists.

587

588 *Varied methylation in the HOX family of genes in aging skeletal muscle tissue and stem cells*

589 In the above analyses in aged versus young cells (all time points) there were 8 CpG's with altered methylation  
590 within the region of the HOXC10 gene just upstream of HOXC6 and MIR196 (Chr12:54383692-54385621,  
591 1933 bp). Also, on the same chromosome just upstream of the HOXC10 gene (Chr12:54376020-54377868,  
592 1849 bp) within lncRNA HOXC-AS3 there were another 6 CpG's that were altered in aged cells versus young  
593 cells. Similarly, within the 5,524 DMP list at 7 d in aged cells versus 7 d young adult cells (Suppl. File **5o**), the  
594 time point most affected by age in the cell analysis, we also identified that a region of the HOXB1, located in  
595 Chr17:46607104-46608568 that contained 8 CpG's that were hypermethylated within the 1465 bp region.  
596 Therefore, we further analysed all the HOX gene changes in the significantly differentially methylated aged  
597 vs. young tissue (6,828 DMP list) and identified that CpG's within HOXD10, HOXD9, HOXD8, HOXA3, HOXC9,  
598 HOXB1, HOXB3, HOXC-AS2 and HOXC10 were significantly differentially methylated across all analyses,  
599 including the aged vs. young tissue (6,828 DMP list; Suppl. File **9a**), aged versus young adult cells (all time)  
600 2,719 DMP list (Suppl. File **9b**) as well as the 7 d aged versus 7 d young cell analysis 5,524 DMP list (Suppl.  
601 File **9c**). A Venn diagram analysis depicted the overlap in common gene symbols for these three gene lists  
602 (Figure **5a**, Suppl. File **9d**). It was also demonstrated that the majority of these HOX genes were  
603 hypermethylated in aged tissue (Figure **5b**; Suppl. File. **9a**). In the cell analysis across all time, these HOX  
604 genes also displayed the most varied methylation at 7 days of differentiation in aged cells versus young cells,  
605 therefore confirming the varied temporal profile in methylation described above at 7 d was also the case for  
606 these HOX genes. Finally, when SOM-profiling these 9 HOX genes by symbol (17 CpGs as some HOX genes  
607 contained more than one CpG site), over the time-course of differentiation based on the main effect for 'age'  
608 2,719 significantly differentially methylated CpG list. Eight CpG sites across HOX family genes: HOXD8  
609 (cg18448949, cg00035316), HOXB1 (cg04904318, cg02497558, cg22660933, cg10558129), HOXC9  
610 (cg02227188) and HOXB3 (cg09952002) were hypermethylated at 7 days, whereas and 7 CpGs across  
611 HOXC10 (cg20402783, cg20403938, cg16898193, cg16791250), HOXB3 (cg23014425, cg04800503), HOXC-  
612 AS2 (cg09605287) were hypomethylated at 7 days (Figure **5c**; Suppl. File **9e**). This meant distinct genes were  
613 hypermethylated (HOXD8, HOXC9, HOXB1) and hypomethylated (HOXC10, HOXC-AS2) at 7 days in aged cells  
614 versus young adult cells, except for one of these genes, HOXB3, that contained 1 CpG that was  
615 hypermethylated versus 2 that were hypomethylated.

616

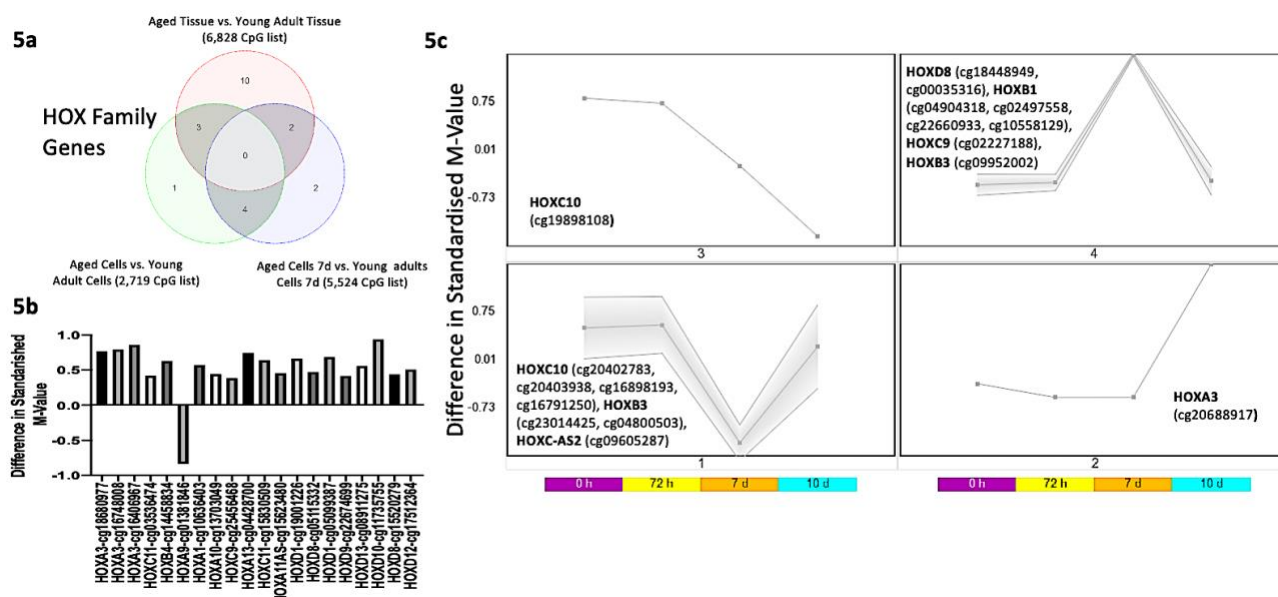

617

618

619

620

621

622

623

624

625

626

627

628

629

630

631

632

633

634

635

636

637

638

639

640

641

642

643

**Figure 5. HOX family of genes and their DNA methylation in aged tissue and muscle stem cells.** **a.** Venn diagram identifying 9 commonly differentially methylated HOX genes: including HOXD10, HOXD9, HOXD8, HOXA3, HOXC9, HOXB1, HOXB3, HOXC-AS2 and HOXC10 (note this Venn diagram analysis is by ‘gene symbol’ not ‘probe cg’ (CpG site), as some HOX genes also had more than 1 CpG per gene symbol, full CpG lists are located in Suppl. Figure 9 **a,b,c,d**). **b.** All HOX family genes by CpG site (cg probe) differentially methylated in aged compared with young skeletal muscle tissue, predominantly all demonstrating hypermethylation. **c.** SOM profiling depicting the temporal regulation of DNA methylation in aged muscle stem cells as they differentiate in CpGs located amongst the HOX family of genes (depicting the 9 HOX genes altered, by gene symbol, in both the tissue and cells). The majority of these HOX CpG sites were differentially methylated at 7 days of differentiation in the aged cells.

We next analysed the gene expression of the HOX genes that changed at the methylation level in both the tissue and cell analysis (by gene symbol- HOXD8, HOXA3, HOXC9, HOXB1, HOXB3, HOXC-AS2 and HOXC10). Interestingly, in aged tissue, despite displaying hypermethylation in all these HOX genes versus young tissue, the genes were not suppressed at the gene expression level, which may have been expected, yet all elevated (Suppl. Figure 9). However, in the aged cells when analysing these genes at the expression level at 7 days of differentiation (including HOXD8, HOXA3, HOXC9, HOXB1, HOXB3, HOXC-AS2 and HOXC-AS3 identified in the above in the cell analysis only) (Figure 6), we identified that there was significantly reduced gene expression in gene HOXB1 (Figure 6), that was inversely related with increased HOXB1 methylation. Where in the 5,524 DMP list at 7 d in aged cells versus 7 d young adult cells (Suppl. File 5o), we previously identified that a region of the HOXB1 located in Chr17:46607104-46608568, contained 8 CpG’s that were hypermethylated, as well as HOXB1 Cg’s: cg04904318, cg02497558, cg22660933, cg10558129 being identified as hypermethylated in the 2,719 significant main effect for ‘age’ cell CpG list above (Suppl. File 3b). There was also significantly increased gene expression for HOXC-AS3, with this gene identified earlier in the analysis as being having reduced (hypo)methylation. Indeed, hypomethylation occurred in 6 CpG’s in a region upstream of the HOXC10 gene (Chr12:54376020-54377868, 1849 bp) within the HOXC-AS3 gene. Interestingly, HOXC10 also demonstrated an average increase in gene expression, however, it was not statistically significant (Figure 6). Finally, HOXA3 also demonstrated significantly reduced expression (Figure



644 6) with corresponding hypermethylation (at 10 not 7 days of differentiation) in aged cells (see Figure 5c).  
 645 Overall, HOXB1, HOXC-AS3 and HOXA3 demonstrated an inverse relationship with CpG methylation and gene  
 646 expression in aged versus young cells.  
 647

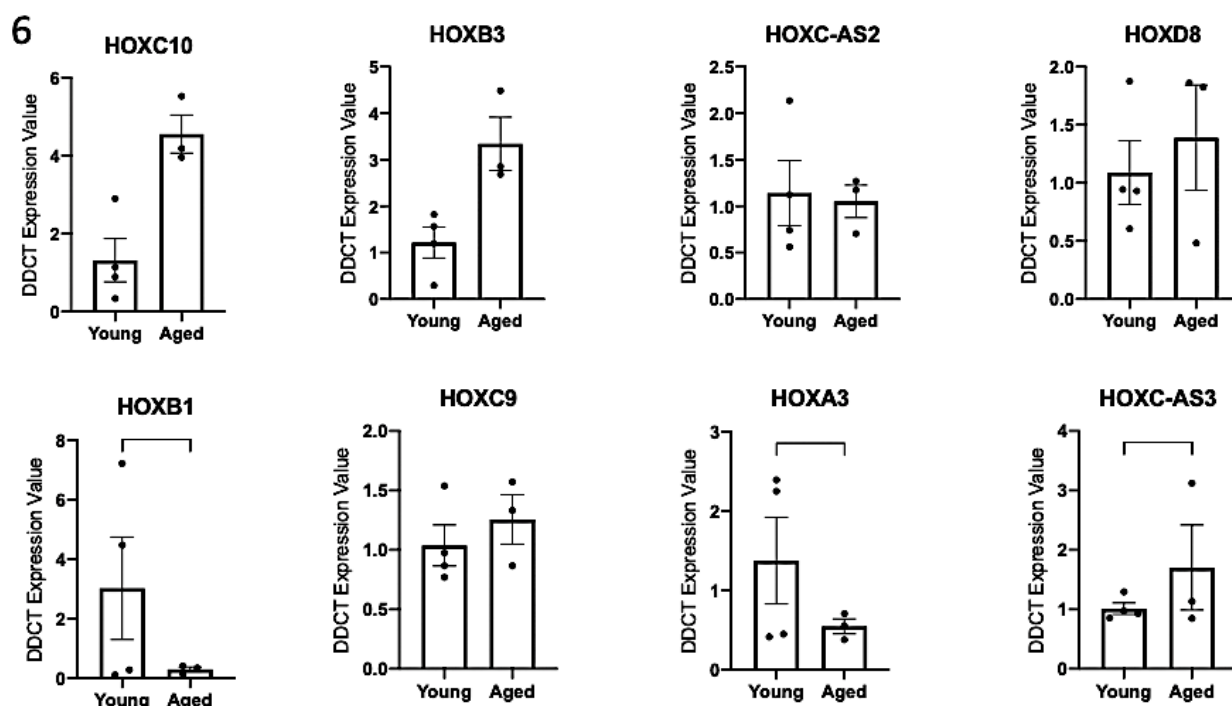

648  
 649 **Figure 6.** Gene expression of the HOX family of genes in aged compared to young muscle stem cells at 7 days of differentiation.  
 650

651 *Effect of physical activity on methylation status of HOX family genes*

652 Next, given that aging generally hypermethylated the genome, we tested the hypothesis that increasing  
 653 physical activity may oppositely regulate DNA methylation and be associated with increasing hypomethylation  
 654 in these HOX genes. We thus performed a multiple regression analysis using methylation data and the level  
 655 of physical activity of 30 endurance-trained men. As in the above analysis, we also found that CpG-sites  
 656 associated with physical activity ( $P < 0.05$ ) were significantly enriched with HOX genes (137 of 1219 CpG-sites,  
 657 Fisher's exact test  $OR = 1.7$ ,  $P = 2.3 \times 10^{-8}$ , Suppl. File 10a). Where we determined that highly active men had  
 658 hypomethylated HOXB1 (cg10558129,  $P = 5.2 \times 10^{-4}$ ), HOXA3 (cg16406967,  $P = 0.03$ ), HOXD12 (cg17512364,  
 659  $P = 0.008$ ) and HOXC4 gene (cg13826247,  $P = 0.014$ ) compared to less active men (adjusted for age and muscle  
 660 fiber composition) on the same sites identified above in the aging data. Furthermore, we identified  
 661 hypomethylation of HOXA3 on several additional sites (cg21134232,  $P = 0.0014$ , cg25768734,  $P = 0.0002$ ;  
 662 cg27539480,  $P = 0.039$ ; cg00431187,  $P = 0.026$ ; cg03483713,  $P = 0.045$ ; cg15982700,  $P = 0.026$ ; cg23806243,  
 663  $P = 0.013$ ). Full methylome analysis of the physical activity dataset can be found in Suppl. File 10b, with details  
 664 of all HOX sites in Suppl. File 10a). Given that we identified the opposite trend in aged muscle and cells,  
 665 particularly HOXB1 and HOXA3 that were hypermethylated in aged tissue and stem cells, and with reduced



666 gene expression in aged cells. These findings suggest that increasing levels of physical activity are associated  
667 with increasing reductions in methylation (hypomethylation) in these HOX genes compared to age-related  
668 changes that are associated with increasing methylation (hypermethylation).

669

## 670 Discussion

671

672 In the present study we first aimed to investigate the methylome in aged skeletal muscle tissue and  
673 differentiating primary muscle stem cells compared with young adults, in order to identify important  
674 epigenetically regulated genes in both aging skeletal muscle tissue and muscle stem cells. As with previous  
675 studies<sup>(18,27)</sup>, and by using more recent, higher coverage array technology, we identified that aged skeletal  
676 muscle tissue demonstrated a considerably hypermethylated profile compared with young adult tissue. We  
677 also demonstrated that these hypermethylated profiles in aged tissue were enriched in gene ontology  
678 pathways including, 'regulation of muscle system process' and KEGG pathways 'pathways in cancer', a  
679 pathway that incorporates previously well described molecular pathways in the regulation of skeletal muscle  
680 such as; focal adhesion, MAPK signaling, PI3K-Akt-mTOR signaling, p53 signaling, Jak-STAT signaling, TGF-  
681 beta and Notch signaling, as well as the other significantly enriched pathways of 'rap1 signaling', 'axon  
682 guidance', and 'hippo signaling'. This was also the first study to profile DNA methylation over the entire time-  
683 course of skeletal muscle differentiation (0, 72 h, 7 and 10 d) using the highest coverage 850K methylation  
684 assays. In primary cell cultures, isolated from aged and young adults matched for the proportion of myogenic  
685 cells, we identified that aged muscle stem cells also demonstrated hypermethylated profiles versus young  
686 adult cells. This hypermethylation was enriched in: 'axon guidance', 'adherens junction' and 'calcium  
687 signaling' pathways. Furthermore, we identified that the process of cellular differentiation itself did not  
688 significantly affect DNA methylation in young cells, however aged cells demonstrated varied methylation  
689 profiles particularly at 7 d of differentiation in GO terms: 'regulation of localisation', 'regulation of cell  
690 communication', and 'regulation of signaling'. Furthermore, in the majority of different CpG sites that were  
691 altered during the process of differentiation, aged cells demonstrated significantly hypermethylated profiles  
692 during differentiation when compared with young adult cells. Again, specifically at 7 d of differentiation  
693 including CpG's located within: 'focal adhesion', 'adherens junction' and 'regulation of actin cytoskeleton'  
694 pathways, as well as the well-known muscle differentiation pathway, 'PI3K-AKT signalling'. This corresponded  
695 with reduced differentiation and myotube formation observed morphologically as well as associated  
696 reductions in myoD and myogenin, and delayed increases in myogenin gene expression in aged compared  
697 with young adult cells. Furthermore, we were able to identify that a small number of CpG sites  
698 hypermethylated in aged tissue were also hypermethylated in aged cells, with CpG's located on genes: KIF15,  
699 DYRK2, FHL2, MRPS33, ABCA17P. This suggested, that perhaps these CpG's retained their methylation status  
700 *in-vitro* after being isolated from the *in-vivo* niche. However, it is worth noting that this was a very small  
701 number of CpG's compared with the thousands of CpG sites significantly differentially methylated in the aged

702 tissue versus young adult tissue, and those also observed to be significantly different in the aged versus young  
703 muscle cells. This was suggestive that the majority of the hypermethylated CpG's observed at the aged tissue  
704 level were generally not retained on the same CpG sites in the isolated aged muscle stem cells *in-vitro*. Also,  
705 PCA plots of muscle tissue versus isolated muscle cells demonstrated vastly different profiles, suggesting that  
706 isolated cells, even late differentiated muscle cells, are perhaps really quite different epigenetic  
707 representations of contrasting cellular entities versus muscle tissue. This also perhaps indicates that  
708 hypermethylation of DNA within myonuclei (the predominant source of DNA in the tissue samples) maybe  
709 therefore unique to that observed in the isolated aged muscle progenitor cells in combination with other  
710 muscle derived cell populations. Indeed, retention of methylation during aging has been previously observed  
711 in artificially aged muscle cells<sup>19</sup>. In skeletal muscle tissue, retention of DNA methylation has been observed  
712 after skeletal muscle growth, even after a subsequent period of muscle loss, suggesting an epigenetic  
713 memory at the DNA methylation level<sup>21, 22, 49</sup>. However, the relative contribution of methylation from  
714 myonuclei or satellite cells (or other resident cell types in muscle tissue) to this epigenetic memory effect,  
715 and how long these retained profiles can last (e.g. past 22 weeks in the Seaborne *et al.*, 2018 study) has not  
716 been determined. However, interestingly based on the present studies data, we could hypothesise that  
717 myonuclear hypermethylation in the tissue with age is quite different to the hypermethylation observed in  
718 muscle progenitor cells as they differentiate. Perhaps, suggesting that environmental stimuli and aging could  
719 affect methylation profiles in the myonuclei differently than those in satellite cells. A hypothesis that requires  
720 further investigation, perhaps using single-cell DNA/RNA analysis of the different cell populations resident in  
721 cells derived from skeletal muscle tissue biopsies compared with cultured cells.

722  
723 Importantly, in both tissue and stem cell analysis, we also identified that the homeobox (HOX) family of genes  
724 were significantly enriched in differentially methylated region analysis, showing several (e.g. 6-8) CpGs to be  
725 methylated within chromosomal regions on these genes in aged compared with young adults. In particular,  
726 we identified: HOXC10 (just upstream of HOXC6) and HOXB1 as having several CpGs differentially  
727 methylated. Therefore, closer analysis of all HOX gene associated CpG changes across both tissue and cell  
728 differentiation data identified that CpG's located within: HOXD10, HOXD9, HOXD8, HOXA3, HOXC9, HOXB1,  
729 HOXB3, HOXC-AS2 and HOXC10 were all significantly differentially methylated across these analyses. In aged  
730 tissue the majority of these HOX genes were hypermethylated. In the cell analysis, these HOX genes displayed  
731 the most varied methylation at 7 days of differentiation in aged versus young cells. Furthermore, distinct  
732 HOX genes were hypermethylated (HOXD8, HOXC9, HOXB1) and hypomethylated (HOXC10, HOXC-AS2) at 7  
733 days in aged cells versus young adult cells. Gene expression analysis also demonstrated an inverse  
734 relationship with DNA methylation. Where hypermethylation of HOXB1 and HOXA3 was associated with  
735 reduced gene expression, and hypomethylation of HOXC-AS3 associated with increased gene expression in  
736 aged versus young cells.

737

738 HOX genes are evolutionary conserved members of the homeobox superfamily, with 39 HOX genes found in  
739 the mammalian genome. They are 'homeotic' genes coding for transcription factors, with a fundamental role  
740 in the determination of cellular identity. They were first shown to be important in embryogenesis in  
741 *Drosophila melanogaster* (fruit fly) <sup>60</sup>. In muscle they have been described to morphologically identify the  
742 hindlimb tissues during development <sup>61, 62, 63, 64</sup>, but have also been demonstrated to be activated in satellite  
743 cells <sup>65, 66</sup>, and as markers of hindlimb derived myoblasts <sup>65</sup>. In particular HOXC10, demonstrated 8 CpG's (just  
744 upstream of HOXC6 and MIR196; Chr12:54383692-54385621, 1933 bp) that all demonstrated a  
745 hypomethylated signature in aged versus young muscle stem cells. There were also 4 CpG sites  
746 hypomethylated, particularly at 7 days of differentiation in aged versus young cells. Indeed, HOXC10 has been  
747 identified to determine hindlimb identity <sup>61, 63</sup>. Together with HOXC10 hypomethylation, we also  
748 demonstrated average (yet not significant) increases in HOXC10 gene expression at 7 days in aged cells versus  
749 young cells. Counterintuitively to our data, previously HOXC10 upregulation has been associated with  
750 satellite cell activation in skeletal muscle in response to Roux-en-Y gastric bypass (RYGB) surgery <sup>67</sup>, as well  
751 as being a marker for hindlimb specific satellite cells. Interestingly, there was lower expression of HOXC10  
752 observed in exercised rats <sup>68</sup>, which is perhaps more intuitive with the data provided here, where aged cells  
753 demonstrated an increase. However, HOXC10 requires more experimentation to define its mechanistic role  
754 in aging skeletal muscle, with HOXC10 and physical exercise being discussed below. Interestingly, the  
755 hypomethylation of the HOXC10 (Chr12:54383692-54385621, 1933 bp) occurred in 8 CpG's on the same  
756 chromosome just upstream of the HOXC10 gene (Chr12:54376020-54377868, 1849 bp), within the lncRNA  
757 HOXC-AS3, where there were another 6 CpG's that were hypomethylated in aged cells versus young cells  
758 (See Suppl. Figure 10 for visualisation of HOXC10 and HOXC-AS3 and their methylation and genomic location).  
759 HOXC-AS3 is a long coding RNA (lcrRNA) with currently no known data in skeletal muscle, with some literature  
760 in cancer and mesenchymal stem cell (MSC) fields <sup>69</sup>. Indeed, MSC's administered with silencing HOXC-AS3  
761 prevented bone loss by enhancing HOXC10 expression <sup>70</sup>, and HOXC-AS3 upregulation has also been linked  
762 with aggressive cancer <sup>71</sup>. Interestingly, we were able to identify that together with associated  
763 hypomethylation, in a region close to the lcrRNA HOXC-AS3, there was significantly increased gene expression  
764 of HOXC-AS3 (and an average, yet not significant increase in HOXC10 gene expression) in aged muscle cells  
765 at 7 days of differentiation. Given the data above in bone and cancer, HOXC-AS3 upregulation appears to be  
766 pro-growth and linked with expression of HOXC10, therefore their increase in the current study maybe  
767 hypothesised to be a co-operative and compensatory drive to maintain aged muscle. However, this  
768 hypothesis is speculative, and more work needs to be conducted as to the role of HOXC10 and HOXC-AS3  
769 and their potential cooperative mechanisms of action in aged skeletal muscle. We also identified that HOXB1  
770 was hypermethylated with increased gene expression in aged cells at 7 days. HOXB1 has been demonstrated  
771 to be hypermethylated in inflamed muscle of children with Juvenile Dermatomyositis (JDM) <sup>72</sup>. This is  
772 interesting given aged skeletal muscle is known to be chronically inflamed <sup>73, 74</sup>, where we also demonstrate  
773 this hypermethylated profile in aged cells. Finally, HOXA3 was hypermethylated with reduced gene

774 expression in aged cells. However, there is currently little to no work on this gene in skeletal muscle<sup>64</sup> and  
775 therefore this requires future investigation. It is however worth noting that gene expression, in the aged  
776 tissue in particular, was not expected given the methylation data. Where aged tissue demonstrated an  
777 increase in gene expression of HOX genes with the majority demonstrating hypermethylation. This may be  
778 due one of the elderly patients' donors demonstrated much greater expression versus all the other donors  
779 for some of the HOX genes. Therefore, in order to confirm this HOX gene expression would require  
780 confirmation in a larger population of aged patients.

781  
782 Finally, with aging evoking a hypermethylated signature in tissue and aged muscle stem cells, it was also  
783 interesting to speculate that physical exercise, that has been shown to hypomethylate the genome<sup>20, 21, 22</sup>,  
784 could therefore be 'anti-ageing' at the epigenetic level. Indeed, this hypothesis was supported indirectly in  
785 the present study and by previous literature, where the aged tissue analysis in the present study identified  
786 the top significantly enriched KEGG pathway as, 'pathways in cancer'. A pathway that incorporates well  
787 known pathways important in skeletal muscle, including: Focal adhesion, MAPK, PI3K-Akt, mTOR, p53  
788 signaling, Jak-STAT, TGF-beta and Notch signaling. Where, this pathway was also the top enriched  
789 hypomethylated pathway after acute and chronic resistance exercise<sup>22</sup>. While, perhaps the significance of  
790 these larger pathways such as 'pathways in cancer' can be inflated in methylation analysis<sup>75</sup>, and therefore  
791 should be viewed with some caution. This data perhaps suggests that exercise (resistance exercise) could  
792 perhaps reverse the hypermethylated profiles in these pathways in aged muscle. Therefore, in the present  
793 study, given that we identified the HOX family of genes to be extensively differentially methylated in aged  
794 tissue and stem cells, we went on to determine that increasing physical activity levels (endurance exercise)  
795 in healthy young adults was associated with larger reductions in HOXB1 and HOXA3 methylation  
796 (hypomethylation). Which was opposite to the changes we observed with age in both muscle tissue and stem  
797 cells, that demonstrated increased hypermethylation with age. This also provided evidence to suggest that  
798 increased physical activity could perhaps reverse the age-related epigenetic changes in the HOX genes.  
799 However, more research into the effect of exercise in an aged population and the changes in HOX  
800 methylation status will be required in the future to confirm these findings.

801

## 802 **Conclusion**

803 Overall, for the first time, we demonstrate that altered methylation of a large number of the HOX genes are  
804 epigenetically differentially regulated in aged human skeletal muscle tissue and during impaired  
805 differentiation in aged muscle stem cells. In particular HOXB1, HOXA3 and HOXC-AS3 (and to a certain extent,  
806 HOXC10) also demonstrated significantly inversed changes in gene expression in aged cells. Finally, that  
807 increased physical activity may help prevent the age-related epigenetic changes observed in these HOX genes

808

809

## 810 **Acknowledgments and funding**

811 These data were supported by a North Staffordshire Medical Institute (NMSI) grant awarded to Adam P.  
812 Sharples (PI), Daniel Turner, Mark Kitchen and Ian Dos-Remedios (Co-I's). This work was also supported by  
813 the UK's Engineering and Physical Sciences Research Council (EPSRC) and the UK Medical Research Council's  
814 (MRC) centre for doctoral training, via a studentship awarded to the joint first author Piotr Gorski in the  
815 group of Adam P. Sharples (PI). Funds from Keele University and Liverpool John Moores University, UK and  
816 The Norwegian School of Sport Sciences, Oslo, Norway also supported the PhD work by Daniel Turner & Piotr  
817 Gorski in the group of Adam P. Sharples. Philipp Baumert received a fully-funded Liverpool John Moores PhD  
818 scholarship. Mohd Firdaus Maasar received a PhD studentship via the Malaysian government agency: Majlis  
819 Amanah Rakyat (MARA) via Barry Drust, Adam P. Sharples and Dr. Andrew Hulten. The physical activity and  
820 DNA methylation study was supported in part by grant from the Russian Science Foundation (Grant No. 17-  
821 15-01436: "Comprehensive analysis of the contribution of genetic, epigenetic and environmental factors in  
822 the individual variability of the composition of human muscle fibers"; DNA sample collection, genotyping,  
823 epigenetic analysis and muscle fibre typing of Russian subjects).

824

## 825 **Declaration**

826 All authors declare no conflicts of interest.

827

## 828 **References**

829

- 830 1. Sharples AP, Hughes DC, Deane CS, Saini A, Selman C, Stewart CE. Longevity and skeletal muscle  
831 mass: the role of IGF signalling, the sirtuins, dietary restriction and protein intake. *Aging cell* **14**, 511-  
832 523 (2015).
- 833 2. Morley JE, Anker SD, von Haehling S. Prevalence, incidence, and clinical impact of sarcopenia: facts,  
834 numbers, and epidemiology-update 2014. *Journal of cachexia, sarcopenia and muscle* **5**, 253-259  
835 (2014).
- 836 3. Shafiee G, Keshtkar A, Soltani A, Ahadi Z, Larijani B, Heshmat R. Prevalence of sarcopenia in the world:  
837 a systematic review and meta- analysis of general population studies. *J Diabetes Metab Disord* **16**,  
838 21 (2017).
- 839 4. Hughes VA, *et al.* Longitudinal muscle strength changes in older adults: influence of muscle mass,  
840 physical activity, and health. *Journals of Gerontology Series A-Biological Sciences & Medical Sciences*  
841 **56**, B209-217 (2001).
- 842 5. Cruz-Jentoft AJ, *et al.* Sarcopenia: European consensus on definition and diagnosis: Report of the  
843 European Working Group on Sarcopenia in Older People. *Age Ageing* **39**, 412-423 (2010).
- 844 6. Hairi NN, *et al.* Loss of muscle strength, mass (sarcopenia), and quality (specific force) and its  
845 relationship with functional limitation and physical disability: the Concord Health and Ageing in Men  
846 Project. *Journal of the American Geriatrics Society* **58**, 2055-2062 (2010).
- 847
- 848
- 849
- 850
- 851
- 852

- 853 7. Cederholm T, Cruz-Jentoft AJ, Maggi S. Sarcopenia and fragility fractures. *European journal of*  
854 *physical and rehabilitation medicine* **49**, 111-117 (2013).  
855
- 856 8. Cooper C, *et al.* Tools in the assessment of sarcopenia. *Calcified tissue international* **93**, 201-210  
857 (2013).  
858
- 859 9. Porter MM, Vandervoort AA, Lexell J. Aging of human muscle: structure, function and adaptability.  
860 *Scandinavian journal of medicine & science in sports* **5**, 129-142 (1995).  
861
- 862 10. Cruz-Jentoft AJ, Landi F, Topinkova E, Michel JP. Understanding sarcopenia as a geriatric syndrome.  
863 *Current opinion in clinical nutrition and metabolic care* **13**, 1-7 (2010).  
864
- 865 11. Beaudart C, Zaaria M, Pasleau F, Reginster J-Y, Bruyère O. Health Outcomes of Sarcopenia: A  
866 Systematic Review and Meta-Analysis. *PLoS ONE* **12**, e0169548 (2017).  
867
- 868 12. Fuggle N, Shaw S, Dennison E, Cooper C. Sarcopenia. *Best Pract Res Clin Rheumatol* **31**, 218-242  
869 (2017).  
870
- 871 13. Sharples AP, Stewart CE, Seaborne RA. Does skeletal muscle have an 'epi'-memory? The role of  
872 epigenetics in nutritional programming, metabolic disease, aging and exercise. *Aging cell* **15**, 603-  
873 616 (2016).  
874
- 875 14. Sharples AP, Seaborne RA, Stewart CE. Epigenetics of Skeletal Muscle Aging. In: *Epigenetics of Aging*  
876 *and Longevity* (ed Vaiserman AM). Academic Press (2018).  
877
- 878 15. Day K, *et al.* Differential DNA methylation with age displays both common and dynamic features  
879 across human tissues that are influenced by CpG landscape. *Genome biology* **14**, R102 (2013).  
880
- 881 16. Voisin S, *et al.* An epigenetic clock for human skeletal muscle. *Journal of cachexia, sarcopenia and*  
882 *muscle*, Epub DOI 10.1002/jcsm.12556 (2020).  
883
- 884 17. Horvath S. DNA methylation age of human tissues and cell types. *Genome biology* **14**, 3156 (2013).  
885
- 886 18. Zykovich A, *et al.* Genome-wide DNA methylation changes with age in disease-free human skeletal  
887 muscle. *Aging cell* **13**, 360-366 (2014).  
888
- 889 19. Sharples AP, Polydorou I, Hughes DC, Owens DJ, Hughes TM, Stewart CE. Skeletal muscle cells possess  
890 a 'memory' of acute early life TNF- $\alpha$  exposure: role of epigenetic adaptation. *Biogerontology* **17**,  
891 603-617 (2016).  
892
- 893 20. Sailani MR, *et al.* Lifelong physical activity is associated with promoter hypomethylation of genes  
894 involved in metabolism, myogenesis, contractile properties and oxidative stress resistance in aged  
895 human skeletal muscle. *Scientific reports* **9**, 3272 (2019).  
896
- 897 21. Seaborne RA, *et al.* Human Skeletal Muscle Possesses an Epigenetic Memory of Hypertrophy.  
898 *Scientific Reports (Nature)* **8**, 1898 (2018).  
899
- 900 22. Turner DC, Seaborne RA, Sharples AP. Comparative Transcriptome and Methylome Analysis in  
901 Human Skeletal Muscle Anabolism, Hypertrophy and Epigenetic Memory. *Scientific reports* **9**, 4251  
902 (2019).  
903
- 904 23. Tsumagari K, *et al.* Early de novo DNA methylation and prolonged demethylation in the muscle  
905 lineage. *Epigenetics : official journal of the DNA Methylation Society* **8**, 317-332 (2013).  
906



- 907 24. Brunk BP, Goldhamer DJ, Emerson JCP. Regulated Demethylation of the myoD Distal Enhancer during  
908 Skeletal Myogenesis. *Developmental Biology* **177**, 490-503 (1996).  
909
- 910 25. Fuso A, *et al.* Early demethylation of non-CpG, CpC-rich, elements in the myogenin 5'-flanking region:  
911 a priming effect on the spreading of active demethylation. *Cell Cycle* **9**, 3965-3976 (2010).  
912
- 913 26. Wu W, Ren Z, Wang Y, Chao Z, Xu D, Xiong Y. Molecular characterization, expression patterns and  
914 polymorphism analysis of porcine Six1 gene. *Molecular Biology Reports* **38**, 2619-2632 (2011).  
915
- 916 27. Bigot A, *et al.* Age-Associated Methylation Suppresses SPRY1, Leading to a Failure of Re-quiescence  
917 and Loss of the Reserve Stem Cell Pool in Elderly Muscle. *Cell reports* **13**, 1172-1182 (2015).  
918
- 919 28. Barberi L, *et al.* Age-dependent alteration in muscle regeneration: the critical role of tissue niche.  
920 *Biogerontology* **14**, 273-292 (2013).  
921
- 922 29. Hidestrand M, *et al.* Sca-1-expressing nonmyogenic cells contribute to fibrosis in aged skeletal  
923 muscle. *J Gerontol A Biol Sci Med Sci* **63**, 566-579 (2008).  
924
- 925 30. Pietrangelo T, Puglielli C, Mancinelli R, Beccafico S, Fano G, Fulle S. Molecular basis of the myogenic  
926 profile of aged human skeletal muscle satellite cells during differentiation. *Exp Gerontol* **44**, 523-531  
927 (2009).  
928
- 929 31. Beccafico S, *et al.* Human muscle satellite cells show age-related differential expression of S100B  
930 protein and RAGE. *Age (Dordr)* **33**, 523-541 (2010).  
931
- 932 32. Sharples AP, Al-Shanti N, Stewart CE. C2 and C2C12 murine skeletal myoblast models of atrophic and  
933 hypertrophic potential: relevance to disease and ageing? *J Cell Physiol* **225**, 240-250 (2010).  
934
- 935 33. Sharples AP, Al-Shanti N, Lewis MP, Stewart CE. Reduction of myoblast differentiation following  
936 multiple population doublings in mouse C2 C12 cells: a model to investigate ageing? *J Cell Biochem*  
937 **112**, 3773-3785 (2011).  
938
- 939 34. Sharples AP, Player DJ, Martin NR, Mudera V, Stewart CE, Lewis MP. Modelling in vivo skeletal muscle  
940 ageing in vitro using three-dimensional bioengineered constructs. *Aging Cell* **11**, 986-995 (2012).  
941
- 942 35. Merritt EK, *et al.* Heightened muscle inflammation susceptibility may impair regenerative capacity in  
943 aging humans. *J Appl Physiol* **115**, 937-948 (2013).  
944
- 945 36. Zwetsloot KA, Childs TE, Gilpin LT, Booth FW. Non-passaged muscle precursor cells from 32-month  
946 old rat skeletal muscle have delayed proliferation and differentiation. *Cell Prolif* **46**, 45-57 (2013).  
947
- 948 37. Bigot A, *et al.* Replicative aging down-regulates the myogenic regulatory factors in human myoblasts.  
949 *Biol Cell* **100**, 189-199 (2008).  
950
- 951 38. Carlson ME, Conboy IM. Loss of stem cell regenerative capacity within aged niches. *Aging cell* **6**, 371-  
952 382 (2007).  
953
- 954 39. Lancioni H, Lucentini L, Palomba A, Fulle S, Micheli MR, Panara F. Muscle actin isoforms are  
955 differentially expressed in human satellite cells isolated from donors of different ages. *Cell biology*  
956 *international* **31**, 180-185 (2007).  
957
- 958 40. Lees SJ, Rathbone CR, Booth FW. Age-associated decrease in muscle precursor cell differentiation.  
959 *Am J Physiol Cell Physiol* **290**, C609-615 (2006).  
960

- 961 41. Lorenzon P, *et al.* Ageing affects the differentiation potential of human myoblasts. *Exp Gerontol* **39**,  
962 1545-1554 (2004).  
963
- 964 42. Charge SB, Brack AS, Hughes SM. Aging-related satellite cell differentiation defect occurs  
965 prematurely after Ski-induced muscle hypertrophy. *Am J Physiol Cell Physiol* **283**, C1228-1241 (2002).  
966
- 967 43. Allen RE, McAllister PK, Masak KC, Anderson GR. Influence of age on accumulation of alpha-actin in  
968 satellite-cell-derived myotubes in vitro. *Mech Ageing Dev* **18**, 89-95 (1982).  
969
- 970 44. Kandalla PK, Goldspink G, Butler-Browne G, Mouly V. Mechano Growth Factor E peptide (MGF-E),  
971 derived from an isoform of IGF-1, activates human muscle progenitor cells and induces an increase  
972 in their fusion potential at different ages. *Mech Ageing Dev* **132**, 154-162 (2011).  
973
- 974 45. Corbu A, *et al.* Satellite cell characterization from aging human muscle. *Neurological research* **32**, 63-  
975 72 (2010).  
976
- 977 46. Shefer G, Van de Mark DP, Richardson JB, Yablonka-Reuveni Z. Satellite-cell pool size does matter:  
978 defining the myogenic potency of aging skeletal muscle. *Developmental Biology* **294**, 55-66 (2006).  
979
- 980 47. Alsharidah M, Lazarus NR, George TE, Agle CC, Velloso CP, Harridge SD. Primary human muscle  
981 precursor cells obtained from young and old donors produce similar proliferative, differentiation and  
982 senescent profiles in culture. *Aging cell* **12**, 333-344 (2013).  
983
- 984 48. Seaborne RA, *et al.* UBR5 is a novel E3 ubiquitin ligase involved in skeletal muscle hypertrophy and  
985 recovery from atrophy. *J Physiol* **597**, 3727-3749 (2019).  
986
- 987 49. Seaborne RA, *et al.* Methylome of human skeletal muscle after acute & chronic resistance exercise  
988 training, detraining & retraining. *Scientific Data (Nature)* **5**, 180213 (2018).  
989
- 990 50. Turner DC, *et al.* Exercising Bioengineered Skeletal Muscle In Vitro: Biopsy to Bioreactor. In: *Methods*  
991 *in Molecular Biology* (2019).  
992
- 993 51. Maksimovic J, Phipson B, Oshlack A. A cross-package Bioconductor workflow for analysing  
994 methylation array data [version 1; referees: 3 approved, 1 approved with reservations].  
995 *F1000Research* **5**, (2016).  
996
- 997 52. Pidsley R, *et al.* Critical evaluation of the Illumina MethylationEPIC BeadChip microarray for whole-  
998 genome DNA methylation profiling. *Genome biology* **17**, 208 (2016).  
999
- 1000 53. Maksimovic J, Gordon L, Oshlack A. SWAN: Subset-quantile within array normalization for illumina  
1001 infinium HumanMethylation450 BeadChips. *Genome Biol* **13**, R44 (2012).  
1002
- 1003 54. Du P, *et al.* Comparison of Beta-value and M-value methods for quantifying methylation levels by  
1004 microarray analysis. *BMC Bioinformatics* **11**, 587 (2010).  
1005
- 1006 55. Kanehisa M, Goto S. KEGG: kyoto encyclopedia of genes and genomes. *Nucleic Acids Res* **28**, 27-30  
1007 (2000).  
1008
- 1009 56. Kanehisa M, Furumichi M, Tanabe M, Sato Y, Morishima K. KEGG: new perspectives on genomes,  
1010 pathways, diseases and drugs. *Nucleic Acids Res* **45**, D353-d361 (2017).  
1011
- 1012 57. Kanehisa M, Sato Y, Kawashima M, Furumichi M, Tanabe M. KEGG as a reference resource for gene  
1013 and protein annotation. *Nucleic Acids Res* **44**, D457-462 (2016).  
1014

- 1015 58. Schmittgen TD, Livak KJ. Analyzing real-time PCR data by the comparative C(T) method. *Nature*  
1016 *protocols* **3**, 1101-1108 (2008).  
1017
- 1018 59. McCartney DL, Walker RM, Morris SW, McIntosh AM, Porteous DJ, Evans KL. Identification of  
1019 polymorphic and off-target probe binding sites on the Illumina Infinium MethylationEPIC BeadChip.  
1020 *Genomics Data* **9**, 22-24 (2016).  
1021
- 1022 60. Shah N, Sukumar S. The Hox genes and their roles in oncogenesis. *Nat Rev Cancer* **10**, 361-371 (2010).  
1023
- 1024 61. DeLaurier A, Schweitzer R, Logan M. Pitx1 determines the morphology of muscle, tendon, and bones  
1025 of the hindlimb. *Dev Biol* **299**, 22-34 (2006).  
1026
- 1027 62. Carpenter EM, Goddard JM, Davis AP, Nguyen TP, Capecchi MR. Targeted disruption of Hoxd-10  
1028 affects mouse hindlimb development. *Development* **124**, 4505-4514 (1997).  
1029
- 1030 63. Logan M, Tabin CJ. Role of Pitx1 upstream of Tbx4 in specification of hindlimb identity. *Science* **283**,  
1031 1736-1739 (1999).  
1032
- 1033 64. Manley NR, Capecchi MR. Hox group 3 paralogous genes act synergistically in the formation of  
1034 somitic and neural crest-derived structures. *Dev Biol* **192**, 274-288 (1997).  
1035
- 1036 65. Choi HY, Jeon H, Yang JW, Ahn JH, Jung JH. Thyroid-Stimulating Hormone Receptor Expression on  
1037 Primary Cultured Human Extraocular Muscle Myoblasts. *Curr Eye Res* **43**, 1484-1488 (2018).  
1038
- 1039 66. Seale P, Ishibashi J, Holterman C, Rudnicki MA. Muscle satellite cell-specific genes identified by  
1040 genetic profiling of MyoD-deficient myogenic cell. *Dev Biol* **275**, 287-300 (2004).  
1041
- 1042 67. Tamboli RA, *et al.* Reduction in inflammatory gene expression in skeletal muscle from Roux-en-Y  
1043 gastric bypass patients randomized to omentectomy. *PLoS ONE* **6**, e28577 (2011).  
1044
- 1045 68. Kato H, Shibahara T, Rahman N, Takakura H, Ohira Y, Izawa T. Effect of a 9-week exercise training  
1046 regimen on expression of developmental genes related to growth-dependent fat expansion in  
1047 juvenile rats. *Physiological reports* **6**, e13880 (2018).  
1048
- 1049 69. Zhang E, *et al.* A novel long noncoding RNA HOXC-AS3 mediates tumorigenesis of gastric cancer by  
1050 binding to YBX1. *Genome biology* **19**, 154 (2018).  
1051
- 1052 70. Li B, *et al.* HOXC10 Regulates Osteogenesis of Mesenchymal Stromal Cells Through Interaction with  
1053 Its Natural Antisense Transcript lncHOXC-AS3. *Stem cells (Dayton, Ohio)* **37**, 247-256 (2019).  
1054
- 1055 71. Wang X, *et al.* HOXB13 promotes proliferation, migration, and invasion of glioblastoma through  
1056 transcriptional upregulation of lncRNA HOXC-AS3. *Journal of cellular biochemistry* **120**, 15527-15537  
1057 (2019).  
1058
- 1059 72. Wang M, Xie H, Shrestha S, Sredni S, Morgan GA, Pachman LM. Methylation alterations of WT1 and  
1060 homeobox genes in inflamed muscle biopsy samples from patients with untreated juvenile  
1061 dermatomyositis suggest self-renewal capacity. *Arthritis and rheumatism* **64**, 3478-3485 (2012).  
1062
- 1063 73. Greiwe JS, Cheng B, Rubin DC, Yarasheski KE, Semenkovich CF. Resistance exercise decreases skeletal  
1064 muscle tumor necrosis factor alpha in frail elderly humans. *FASEB journal : official publication of the*  
1065 *Federation of American Societies for Experimental Biology* **15**, 475-482 (2001).  
1066

- 1067 74. Leger B, Derave W, De Bock K, Hespel P, Russell AP. Human sarcopenia reveals an increase in SOCS-  
1068 3 and myostatin and a reduced efficiency of Akt phosphorylation. *Rejuvenation research* **11**, 163-  
1069 175B (2008).  
1070  
1071 75. Reimand J, *et al.* Pathway enrichment analysis and visualization of omics data using g:Profiler, GSEA,  
1072 Cytoscape and EnrichmentMap. *Nature protocols* **14**, 482-517 (2019).  
1073  
1074
